# Supplementary material for: Identification and validation of N-acetyltransferase 2 as an insulin sensitivity gene
Source: JCI journal article supplement (doi:10.1172/jci74692), 2015-03-23
Supplement: sd1 [file 1]

**Identification and validation of *NAT2* as an insulin sensitivity gene**

**Supplementary appendix**

**Knowles JW et al.**

### ***GWAS study populations and phenotyping, detailed descriptions***

#### RISC (Relationship between Insulin Sensitivity and Cardiovascular disease)

The RISC study is a prospective study of 1500 healthy men and women of European ancestry, aged between 30-60 years, from 20 centers in 13 European countries. Subjects underwent a hyperinsulinemic-euglycemic clamp (1) and those with diabetes, hypertension or dyslipidemia were excluded, yielding a total of 1046 subjects appropriate for inclusion of which 1004 remained after excluding non-Caucasians and 4SD outliers of insulin sensitivity. Insulin sensitivity was measured by hyperinsulinaemic-euglycemic clamp as previously described (1). Exogenous insulin was administered as a primed-continuous intravenous infusion at a rate of  $240 \text{ pmol min}^{-1} \text{ m}^{-2}$  for 120 min, simultaneously with a variable 20% (wt/vol) glucose infusion. This was adjusted every 5 to 10 min to maintain plasma glucose concentration within 0.8 mmol/l of the target glucose concentration (4.5–5.5 mmol/l). Insulin sensitivity was assessed as the mean glucose infusion rate over the last 40 min of the clamp, corrected for the lean body mass (M value; micromol/kg bodywt/min). To ensure consistency across study centres, the clamp procedure was standardized.

#### ULSAM (Uppsala Longitudinal Study of Adult Men)

ULSAM is an ongoing, population based study of all men, born 1920-1924, in Uppsala, Sweden. All 50- year-old men living in Uppsala in 1970-1974 were invited to participate. Of the 2841 eligible men, 2322 (82%) participated (2-5). Major health outcomes are being tracked by linking to Swedish national registries. Participants were examined, had blood drawn for basic metabolic profiles and other measures and underwent diagnostic tests. The EC was performed between 1991-1995. DNA has been extracted and is stored at the SNP technology platform, Uppsala (6,

7). Insulin sensitivity was determined using the hyperinsulinaemic-euglycemic insulin clamp technique, according to DeFronzo *et al.* (1979) (8), but with a higher insulin infusion rate [56 vs. 40 mU min<sup>-1</sup> (m<sup>2</sup>)<sup>-1</sup>] to achieve nearly complete suppression of hepatic glucose output (9). Glucose disposal rate, representing insulin sensitivity, was calculated as the amount of glucose taken up during the last 60 minutes of the clamp procedure and is presented in mg/kg of body weight per minute.

#### EUGENE2 (European network on Functional Genomics of type 2 diabetes)

EUGENE2 is a European Union-funded study involving eight countries focusing on the causes and consequences of T2D. One goal is to identify new candidate genes for T2D and IR. All participants in EUGENE2 were healthy non-diabetic offspring of parents with T2D. For inclusion, one of the parents had to have T2D and the other parent normal OGTT. Eight hundred and forty-six non-diabetic offspring were included and 617 of these subjects underwent EC using well-established protocols (8, 10, 11), and 591 were available for the genetic analysis.

Participants underwent 75-g oral glucose tolerance test (OGTT) and intravenous glucose tolerance tests (IVGTT). A bolus of glucose (300 mg/kg in a 50% solution) was given into the antecubital vein within 30 s for the IVGTT. At 60 min after the glucose bolus a hyperinsulinaemic-euglycemic clamp was initiated (insulin infusion: 240 pmol m<sup>-2</sup> min<sup>-1</sup> for 120 min) to evaluate insulin sensitivity (8). Glucose was clamped at 5.0 mmol/l for the next 120 min by infusion of 20% glucose at various rates according to glucose measurements performed at 5 min intervals. The glucose disposal during the clamp was expressed as the amount of glucose infused per kilogram body weight per minute during the last 60 min of the clamp examination (micromol/kgbodywt/min).

### Stanford Insulin Suppression Test (IST) cohort

This cohort includes a subset of all subjects participating in various clinical research studies at Stanford University Medical center that required an insulin suppression test (IST) since 2002 (12-14). Participants in these studies are volunteers from the surrounding Stanford communities and were all free of major chronic medical conditions at the time of the IST, including T2D, cardiovascular disease (CVD), hypertension, liver or kidney disease. Subjects were excluded from participation if they reported being on medications known to influence insulin sensitivity including corticosteroids, metformin, sulfonylureas or thiazolidinediones. For the current study, 270 Caucasian subjects were included. Insulin sensitivity was measured by the modified insulin suppression test (IST)(15). The steady state plasma glucose (SSPG) value from the IST is highly inversely correlated to M-value ( $r < -0.9$ ,  $P < 0.001$ ) (16-18).

### ***Replication genotyping cohorts, detailed descriptions***

#### GUARDIAN (Genetics Underlying DIAbetes in HispaNics)

Seven cohorts are included in the GWAS phase of the GUARDIAN study: five family-based studies (IRAS Family, BetaGene, MACAD, HTN-IR, NIDDM-Athero) and two non-family based studies (IRAS, TRIPOD) (19). All cohorts are of self-reported Hispanic ancestry (majority of Mexican origin). Persons with self-reported and laboratory confirmed diabetes are not included. Insulin sensitivity was measured by euglycemic clamp in MACAD, HTN-IR, and NIDDM-Athero under an identical protocol. During the hyperinsulinemic-euglycemic clamp (8), a priming dose of human insulin (Novolin, Clayton, NC) was given and followed by infusion for 120 minutes at a constant rate ( $60 \text{ mU m}^{-2} \text{ min}^{-1}$ ) to establish hyperinsulinemia. Blood was

sampled every 5 minutes, and the rate of 20% dextrose co-infused was adjusted to maintain plasma glucose concentrations at 95 to 100 mg/dL. The glucose infusion rate (M value) over the last 30 minutes of steady-state insulin and glucose concentrations reflects glucose uptake by all tissues of the body (primarily insulin-mediated glucose uptake in muscle) and is therefore directly correlated with tissue insulin sensitivity (8). Additional descriptions of the three cohorts from GUARDIAN are below:

**The Hypertension-Insulin Resistance Family Study (HTN-IR)** was designed as a family study to examine the genetic basis of hypertension and insulin resistance (20). Family members of probands with documented hypertension were recruited in the Los Angeles area. GUARDIAN includes 708 of these individuals from 156 families (of which 624 were available for the genetic study here). Insulin sensitivity was obtained by euglycemic clamp. Other phenotypes include OGTT, carotid intima-media thickness by B-mode ultrasonography, and salt sensitivity.

**The Mexican-American Coronary Artery Disease (MACAD) Study** was designed as a family study to examine the genetic basis of coronary artery disease and insulin resistance (21). Family members of probands with documented coronary artery disease were recruited from the Los Angeles area. GUARDIAN includes 772 of these individuals from 208 families (of which 737 were available for the current study). Insulin sensitivity was obtained by euglycemic clamp. Other phenotypes include OGTT, carotid intima-media thickness by B-mode ultrasonography, total body fat by DXA scan, and post-heparin lipase activity assessment.

The **NIDDM-Atherosclerosis Study** was designed as a family study to examine the genetic basis of subclinical atherosclerosis and diabetes (22). Family members of probands with T2D were recruited in the Los Angeles area. GUARDIAN includes 188 of these individuals from 93 families (of which 179 were available for the current study). Insulin sensitivity was obtained by euglycemic clamp. Other phenotypes include OGTT and carotid intima-media thickness by B-mode ultrasonography.

The GUARDIAN cohort was genotyped using the Illumina Human Omni Express platform.

#### Minnesota cohorts

Three separate studies of Minnesota children and adolescents were part of the effort, described separately below (23-25). Genotyping data was obtained from 930 subjects from Minnesota recruited into three separate studies of school children and adolescents aimed at the study of insulin resistance and related traits such as obesity and hypertension. Many of the subjects in these studies underwent EC testing either at the time of enrollment or at a later time point. For the current study, we excluded data on subjects < 18 years of age because these measurements often fluctuate in adolescence. Characteristics of subjects who had EC are summarized in Supplementary Table 1.

The **Insulin Resistance Study** cohort included subjects of European ancestry (n = 570) from a study of Minnesota schoolchildren (n=195), their siblings (n=152) and parents (n=223). These children participated in a longitudinal study of the role of insulin resistance and adiposity in the development of cardiovascular risk and type 2 diabetes, and were randomly selected from a

sampling frame of 12,043 11-14 year old Minneapolis school children (representing 93% of all students in those grades) who underwent blood pressure screening in 1995. The children had repeated exams and ECGs as part of the study (up to four total), and the most recent available ECG was used in analysis. Some siblings and parents of these children were also examined and had ECGs.

**The Prevention of High Blood Pressure in Children Study (PHBPC) study** is a cohort (n = 265) selected from blood pressure screening of 10,423 1st-3rd grade children (99% of all children enrolled in those grades) in the Minneapolis Public Schools in 1977-78. Approximately 30 years later (2007-12), original PHBPC participants along with their eligible children were recontacted and invited to participate in a follow-up examination that included an ECG.

**The Sodium-Potassium Blood Pressure Trial in Children (NaKS)** cohort (n=121) was originally recruited to participate in, a clinical trial designed to evaluate modification of dietary sodium and potassium intake in a healthy, free living population of children and adolescents. Screening was conducted in 19,452 students in grades 5-8 in Minneapolis and St. Paul between January 1986 and May 1987. At the conclusion of four prerandomization visits, 243 children agreed to be randomized to one of four trial groups: low-sodium diet; potassium supplement administration; placebo-treated control group; and a no-treatment control group (to test the effect of acclimatization on blood pressure measurements). An ECG was conducted as part of a post-trial follow-up exam in young adulthood when participants were between 23-32 years of age.

Scandinavian cohorts

Genotyping data was also obtained from 329 subjects from Scandinavia had undergone ECs as part of two separate studies related to insulin resistance and diabetes: 1) Botnia, 2) Malmö-sib (26-28). Altogether genotype data was available from 278 individuals from the Botnia study (29) and 51 individuals from the Malmö-sib study. In this analysis, diabetic individuals were excluded.

#### The Stanford Asian and Pacific Program for Hypertension and IR (SAPPHIRE) Cohort

SAPPHIRE was part of the NHLBI Family Blood Pressure Program (FBPP). The primary aim of this study was identifying genes contributing to the risk of hypertension and IR. SAPPHIRE has a sibpair study design and includes a total of 1588 East Asian subjects recruited mostly from Taiwan and Hawaii. Exclusion criteria included diabetes, BMI > 35 and severe renal or liver disease. A smaller subset of 491 sibs from 202 families successfully underwent an IST (30, 31).

#### ***GWAS genotyping, quality control and imputation of individual studies***

##### RISC

Samples were genotyped on the Affymetrix 6.0 microarray platform. We used standard QC criteria, including genotyping call rate >95%, Hardy–Weinberg equilibrium P-values (HWE- $P$ )>0.0001 and MAF > 1%, which left 747,423 single nucleotide polymorphisms (SNPs) for analysis. Using these SNPs we excluded samples that had sex-mismatches, were related with a  $PI\_hat > 0.2$  or were non-European individuals based on EIGENSTRAT analysis (32). We then used MACH (33) to first phase the haplotypes and then ran MiniMac (34) to impute the genotypes on the 1000 Genomes Project data (Interim 20101123 phase 1) against all-population reference panel (monomorphic and singleton sites excluded). After imputation, the exclusion

criteria for quality control were: imputation quality  $r^2 < 0.3$  and minor allele count (MAC)  $< 5$ .

After imputation and quality filters, a total of 8,207,865 SNPs were used for association analysis.

### ULSAM

Genotyping was performed using the Illumina Omni2.5M and Illumina MetaboChip at the SNP&SEQ Technology Platform in Uppsala ([www.genotyping.se](http://www.genotyping.se)). Sample exclusion criteria included: 1) genotype call rate  $< 95\%$ ; 2) heterozygosity  $> 3$  SD; 3) gender discordance; 4) duplicated samples; 5) identity-by-descent match; and 6) ethnic outliers. SNP exclusion criteria of genotyped data before imputation included: 1) monomorphic SNPs; 2) Hardy-Weinberg equilibrium (HWE)  $p\text{-value} < 1 \times 10^{-6}$ ; 3) genotype call rate  $< 0.99$  (SNPs with  $\text{MAF} < 5\%$ ) or  $< 0.95$  (SNPs with  $\text{MAF} \geq 5\%$ ); 4)  $\text{MAF} < 1\%$ . Missing genotypes were imputed on the 1000 Genomes Project data (Interim 20101123 phase 1) against all-population reference panel in IMPUTE. After imputation, the exclusion criteria for quality control were: imputation quality  $< 0.4$  and minor allele count (MAC)  $< 5$ .

### EUGENE2

Samples were genotyped on the Illumina 550K platform in the Helsinki Genome Centre. In total, 561,301 SNPs were called. SNPs were filtered on genotyping call rate  $> 95\%$ , HWE- $P > 0.0001$  and  $\text{MAF} > 1\%$ , then imputed on the 1000 Genomes Project data (Interim 20101123 phase 1) against all-population reference panel. After imputation, the exclusion criteria for quality control were: imputation quality  $r^2 < 0.3$  and minor allele count (MAC)  $< 5$ .

### Stanford IST

Samples from the Stanford IST cohort were genotyped on the Affymetrix 6.0 microarray platform. In total, 909,508 SNPs were called. SNPs were filtered on genotyping call rate >90%, HWE- $P > 1 \times 10^{-6}$  and MAF > 1%, then imputed on the 1000 Genomes Project data (Interim 20101123 phase 1) against all-population reference panel. Individuals showing non-European ancestry and sex-mismatches were removed. After imputation, the exclusion criteria for quality control were: imputation quality  $r^2 < 0.3$  and minor allele count (MAC) < 5.

### ***Study-specific statistical analyses***

We carried out GWAS separately within each cohort using MACH2QTL or SNPTEST based on an additive genetic model (33, 35, 36). EUGENE2 was a family-based study: there were 610 pairs of related individuals in EUGENE2 (by the cut-off  $P(\text{IBD}=2) + 0.5 * P(\text{IBD}=1) > 0.2$  in PLINK(37)). We accounted for the relatedness using the genome-wide efficient mixed-model association (GEMMA)(38) software.

### ***In silico lookup and de novo replication genotyping***

The SNPs carried forward were: rs9877159 (chr3: near *GMNC*, GWAS  $P = 5.6 \times 10^{-6}$ ); rs1208 and rs1801280 (chr8: spanning *NAT2*, with GWAS  $P = 9.8 \times 10^{-7}$  and  $P = 3.7 \times 10^{-6}$ ); rs117421960 (chr8: near *TMEM64* and *NECAB1*, GWAS  $P = 3.6 \times 10^{-6}$ ); rs1775921 (near *BAMBI*, GWAS  $P$  value  $4.3 \times 10^{-6}$ ). If the GWAS SNP was not available we chose to look at the best proxy. For instance, rs1208 was not directly genotyped so rs7832071 was used as a proxy ( $r^2 = 0.97$ ).

### ***NAT2 predicted acetylator phenotype analysis***

The analysis was tested in RISC, Stanford and EUGENE2 (the subgroup of unrelated individuals)(total N=1753). The 6-SNPs used to predict acetylation phenotype are: rs1208 (803A>G), rs1041983 (282C>T), rs1799929 (481C>T), rs1801280 (341T>C), rs1799930 (590G>A) and rs1799931 (857G>A).

### ***3T3-L1 cell culture***

3T3-L1 cells were cultured in growth medium, consisting of Dulbecco's Modified Eagle's Medium (DMEM) (Invitrogen; Carlsbad, CA) supplemented with 10% FBS, 100 U/ml penicillin and 100 ug/ml streptomycin. Differentiation of 2-day postconfluent 3T3-L1 cells was initiated with 0.5 mM 3-isobutyl-1-methylxanthine, 1 $\mu$ M dexamethasone, and 1.25  $\mu$ M insulin in DMEM supplemented with 10% FBS. After 48 h, the culture medium was replaced with DMEM supplemented with 10% FBS and 1  $\mu$ g/mL insulin for an additional 48 h, and the cells were then fed every other day with DMEM containing 10% FBS. The degree of differentiation was assayed by Oil-Red O stain. For experiments, overnight-serum-starved, differentiated adipocytes were used.

### ***RNA extraction, reverse transcription and real-time PCR***

Total RNA from cells and mouse tissues were isolated using an RNeasy minikit (Qiagen) according to the manufacturer's protocol. Two microgram of total RNA was reverse transcribed using the high capacity cDNA reverse transcription kit (Applied Biosystems, Foster City, CA, USA). Quantitative real-time PCR was performed on ViiA™ 7 Light Cycler (Applied Biosystems) using the Power SYBR® Green PCR Master Mix (Applied Biosystems). The gene expression values were normalized to cyclophilin A as a housekeeping gene. The data were

analyzed by the public domain program Relative Expression Software Tool – REST. Values are presented as mean  $\pm$  SEM

### ***Lipolysis in 3T3-L1 cells***

Differentiated 3T3-L1 adipocytes were incubated in DMEM with 1.5% fatty acid-free BSA and exposed to insulin and/or isoproterenol (an adrenergic agonist known to stimulate lipolysis) for 1 h. Free fatty acid (FFA) levels present in the medium were determined with a colorimetric kit (non-esterified fatty acid kit; Wako) and normalized to cell density (39).

### ***Glucose uptake in 3T3-L1 cells***

Insulin-stimulated glucose uptake was measured as previously described using the fluorescently labeled glucose analog 2-deoxy-2-[(7-nitro-2,1,3-benzoxadiazol-4-yl) amino]-D-glucose (2-NBDG) (Cayman Chemical) in fully differentiated 3T3-L1 cells. Confluent 3T3-L1 cells were starved overnight in DMEM with no glucose or fetal calf serum (FCS). Cells were incubated with insulin (1, 10, 100 nM) or vehicle for 15 minutes at 37°C in 100uL DMEM containing 150 ug/ml 2-NBGD but no glucose or FCS. The known glucose transport inhibitors apigenin (1:1000 dilution) and cytochalasin B were used as negative controls (40).

### ***Adipogenesis of 3T3-L1 preadipocytes***

3T3-L1 preadipocytes were plated onto 24-well tissue culture plates maintained in regular growth DMEM (10% FBS) until they reached 70% confluence for the first transfection (Day 0). For knockdown experiments, 3T3-L1 adipocytes were transfected with 20nM synthetic predesigned siRNA targeting *Nat1* or non-silencing siRNA (scr siRNA). Six hours post-

transfection, the medium containing transfection reagent was changed to differentiation medium (regular growth DMEM containing 0.5mM IBMX, 1uM dexamethasone, 1.25uM Insulin). Two days later (Day 2) the medium was changed to growth DMEM medium containing 1.25uM insulin for two days. The second transfection of 3T3-L1 cells was accomplished as described above on day 4. Six hours after transfection, the 3T3-L1 cells were kept in regular growth DMEM medium that was changed every two days until last day when they were fully mature adipocytes.

### ***Nat1 targeted mice***

The ES cell clone was originally generated by Regeneron Pharmaceuticals, Inc. Methods used to generate the Velocigene targeted alleles have been published previously (41).

### ***Glucose tolerance test (GTT):***

For GTT the mice (10 - 12 week old) were injected i.p. after overnight fasting with 2 g glucose/kg body weight. Blood was collected at 0, 15, 30, 60 and 120 min after injection from the tail vein of conscious animals and blood glucose was measured using a glucometer (TRUEbalance, Nipro Diagnostics, Inc.) (42).

### ***Insulin tolerance test (ITT):***

ITTs were performed by injecting 1.0 U per kg body weight human insulin i.p. into mice (10 - 12 week old) after 6 h fasting, followed by blood collection at 0, 30, 60 and 120 min after injection. Blood glucose values were determined using a glucose monitor (TRUEbalance, Nipro Diagnostics, Inc.)(42).

**Supplementary Table 1:** Demographic and clinical characteristics of replication cohorts

| Traits                                 | GUARDIAN<br>MACAD (n=743) | GUARDIAN<br>HTN-IR (n=680) | GUARDIAN<br>NIDDM- Athero<br>(n=178) | Insulin<br>Resistance<br>Study (n=570) | PHBPC<br>(n=265)     | NaKs<br>(n=121)      | Botnia<br>(n=399)    | Malmö-sib<br>(n=77)  | SAPPHIRE<br>(n=489) <sup>†</sup> |
|----------------------------------------|---------------------------|----------------------------|--------------------------------------|----------------------------------------|----------------------|----------------------|----------------------|----------------------|----------------------------------|
| Female (%)                             | 57%                       | 59%                        | 57%                                  | 52%                                    | 46%                  | 50%                  | 44%                  | 50.6%                | 55%                              |
| Age (yrs)*                             | 34<br>(18, 64)            | 37<br>(18, 87)             | 32<br>(18, 69)                       | 32.0<br>(18, 64)                       | 38<br>(18, 42)       | 27.0<br>(23, 32)     | 50.5<br>(18, 84)     | 49.2<br>(18, 73)     | 48.3<br>(26, 72)                 |
| Fasting<br>Insulin<br>(pmol/L)         | 96.3<br>(18, 513)         | 93.2<br>(18, 630)          | 88.8<br>(25.2, 327)                  | 61.4<br>(6, 1243)                      | 55.9<br>(6.9, 590)   | 76.0<br>(13.9, 476)  | 41.7<br>[7.0-419.5]  | 52.1<br>(0.83-152.1) | 46.8<br>(2.4, 233.4)             |
| Fasting<br>Glucose<br>(mmol/L)         | 5.1<br>(3.3, 6.9)         | 5.3<br>(3.4, 6.9)          | 4.9<br>(2.4, 6.8)                    | 4.9<br>(3.5, 6.9)                      | 4.9<br>(3.2, 6.9)    | 5.3<br>(0.3, 6.8)    | 6.3<br>(3.8, 20.2)   | 6.7<br>(4.3, 21.2)   | 5.1<br>(2.8, 18.1)               |
| BMI (kg/m <sup>2</sup> )               | 28.9<br>(16.9, 48.6)      | 28.7<br>(17.3, 52.8)       | 28.6<br>(16.3, 60.1)                 | 26.9<br>(16.5, 59.8)                   | 28.1<br>(16.3, 55.2) | 28.5<br>(18.6, 48.5) | 26.8<br>(16.9, 52.6) | 25.7<br>(18.1, 41.9) | 25.3<br>(18.3, 39.2)             |
| Insulin<br>Sensitivity †               | 33.1<br>(1.3, 91.3)       | 31.6<br>(4.4, 83.2)        | 31.0<br>(5.5, 72.4)                  | 43.7<br>(8.5, 99.4)                    | 45.0<br>(5.0, 91.6)  | 40.7<br>(2.9, 108.9) | 35.6<br>(5.6-76.7)   | 38.9<br>(8.9-82.8)   | 175.8<br>(40.9, 371.8)           |
| Systolic BP<br>(mmHg)                  | 114.1<br>(71, 167)        | 122.6<br>(85, 201)         | 117.3<br>(87, 157)                   | 112.7<br>(88, 168)                     | 114.0<br>(83, 160)   | 115.1<br>(89, 159)   | 129.6<br>(95, 195)   | 126.6<br>(105, 180)  | 128.3<br>(81, 235)               |
| Total<br>Cholesterol<br>(mmol/L)       | 4.7<br>(3.4, 6.9)         | 4.6<br>(2.1, 8.3)          | 4.5<br>(2.8, 7.6)                    | 4.5<br>(2.6, 7.6)                      | 4.7<br>(2.9, 7.5)    | 4.3<br>(0.1, 4.6)    | 5.6<br>(3.0, 12.5)   | 5.3<br>(3.2, 8.1)    | 4.9<br>(2.2, 9.2)                |
| LDL<br>(mmol/L)                        | 2.8<br>(3.0, 5.2)         | 2.7<br>(0.8, 5.7)          | 2.7<br>(0.7, 5.2)                    | 2.7<br>(0.8, 5.9)                      | 2.8<br>(1.1, 4.7)    | 2.5<br>(.01, 4.6)    | 3.6<br>(1.3, 10.7)   | 3.4<br>(1.2, 5.9)    | 3.2<br>(0.2, 7.6)                |
| HDL<br>(mmol/L)                        | 1.2<br>(0.6, 2.7)         | 1.3<br>(0.6, 2.7)          | 1.2<br>(0.3, 2.2)                    | 1.2<br>(0.5, 2.5)                      | 1.3<br>(0.6, 2.6)    | 1.1<br>(.02, 2.3)    | 1.3<br>(0.8, 2.4)    | 1.2<br>(0.5, 7.2)    | 1.1<br>(0.4, 2.5)                |
| TG (mmol/L)                            | 1.5<br>(0.3, 11.0)        | 1.3<br>(0.3, 5.5)          | 1.4<br>(0.3, 13.3)                   | 1.3<br>(0.2, 10.4)                     | 1.5<br>(0.4, 12.5)   | 1.4<br>(.01, 6.9)    | 1.4<br>(0.4, 6.0)    | 1.5<br>(0.5, 7.2)    | 1.5<br>(0.3, 9.5)                |
| Smokers (%)<br>(at time of<br>'clamp') | 0.2                       | NA                         | NA                                   | 22%                                    | 24%                  | 27%                  | NA                   | NA                   | 18%                              |

\* Age is mean (range), † In all studies except Stanford and SAPPHIRE, the insulin sensitivity was measured by hyperinsulinaemic-euglycemic clamp (M-value (micromol/kgbodywt/min)). The M-value has a positive correlation with insulin sensitivity (i.e. an individual with a high M-value has high insulin sensitivity). In the Stanford and SAPPHIRE studies, insulin sensitivity was measured by steady-state plasma glucose (SSPG) method (mg/dl). The SSPG value is highly inversely correlated to M-value ( $r \sim -0.9$ )(17, 18). **Conversion factors:** Total Cholesterol, LDL and HDL: 1 mmol/l = 38.6 mg/dl, TGs: 1 mmol/l = 88.5 mg/dl, Glucose: 1mmol/l = 18.0 mg/dl,

**Supplementary table 2:** Association statistics for rs1208

|                                                        |        |        |             |          |
|--------------------------------------------------------|--------|--------|-------------|----------|
| <b>Age and sex adjusted including all cohorts</b>      |        |        |             |          |
| group                                                  | Weight | Effect | Std error   | P        |
| RISC                                                   | 1004   | -0.12  | 0.04        | 0.007    |
| ULSAM                                                  | 899    | -0.10  | 0.05        | 0.044    |
| EUGENE2                                                | 591    | -0.04  | 0.06        | 0.546    |
| Stanford                                               | 270    | -0.10  | 0.09        | 0.270    |
| BOTNIA                                                 | 278    | 0.01   | 0.08        | 0.885    |
| MALMO-SIB                                              | 51     | 0.17   | 0.19        | 0.373    |
| MACAD                                                  | 743    | 0.00   | 0.06        | 0.995    |
| HTN-IR                                                 | 680    | -0.08  | 0.06        | 0.170    |
| NIDDM-Athero                                           | 178    | 0.03   | 0.11        | 0.764    |
| Insulin Resistance Study                               | 564    | -0.04  | 0.06        | 0.570    |
| PHPBC                                                  | 251    | -0.14  | 0.09        | 0.110    |
| NaKs                                                   | 115    | 0.14   | 0.13        | 0.310    |
| Meta Analysis                                          | 5624   | -0.056 | 0.019       | 0.002    |
| <b>Age and sex adjusted excluding NaKs</b>             |        |        |             |          |
| Meta Analysis                                          | 5509   | -0.064 | 0.02        | 0.001    |
| <b>Age, sex and BMI adjusted including all cohorts</b> |        |        |             |          |
| group                                                  | Weight | Effect | Std error   | P        |
| RISC                                                   | 1004   | -0.13  | 0.04        | 0.003    |
| ULSAM                                                  | 899    | -0.14  | 0.05        | 0.004    |
| EUGENE2                                                | 591    | -0.12  | 0.06        | 0.045    |
| Stanford                                               | 270    | -0.16  | 0.09        | 0.095    |
| BOTNIA                                                 | 278    | -0.07  | 0.08        | 0.426    |
| MALMO-SIB                                              | 51     | 0.16   | 0.18        | 0.397    |
| MACAD                                                  | 743    | -0.01  | 0.05        | 0.783    |
| HTN-IR                                                 | 680    | -0.10  | 0.05        | 0.036    |
| NIDDM-Athero                                           | 178    | -0.03  | 0.09        | 0.752    |
| Insulin Resistance Study                               | 564    | -0.04  | 0.06        | 0.570    |
| PHPBC                                                  | 251    | -0.14  | 0.09        | 0.110    |
| NaKs                                                   | 115    | 0.29   | 0.13        | 0.030    |
| Meta Analysis                                          | 5624   | -0.09  | 0.02        | 2.83E-06 |
| <b>Age, sex and BMI adjusted excluding NaKs</b>        |        |        |             |          |
| Meta Analysis                                          | 5509   | -0.094 | 0.018877551 | 6.38E-07 |

**Supplementary Table 3:** The loci influencing glycemic traits from Scott *et al.* (2012) and their associations to clamp-measured insulin sensitivity in our study

| SNP                                     | chr | position<br>(Hg19) | gene                       | trait-<br>raising<br>allele<br>/other<br>allele | trait<br><i>P</i>      | IS effect<br>Direction* | IS<br><i>P</i> | IS (bmi) effect<br>Direction* | IS (bmi)<br><i>P</i>  |
|-----------------------------------------|-----|--------------------|----------------------------|-------------------------------------------------|------------------------|-------------------------|----------------|-------------------------------|-----------------------|
| <b>Fasting insulin</b>                  |     |                    |                            |                                                 |                        |                         |                |                               |                       |
| rs2972143                               | 2   | 227,116,365        | <i>IRS1</i>                | G/A                                             | $3.2 \times 10^{-8}$   | -                       | 0.46           | -                             | 0.05                  |
| rs731839                                | 19  | 33,899,065         | <i>PEPD</i>                | G/A                                             | $1.7 \times 10^{-8}$   | +                       | 0.04           | +                             | 0.12                  |
| rs7903146                               | 10  | 114,758,349        | <i>TCF7L2</i>              | C/T                                             | $6.1 \times 10^{-11}$  | -                       | 0.27           | -                             | 0.23                  |
| rs2820436                               | 1   | 219,640,680        | <i>LYPLAL1</i>             | C/A                                             | $4.4 \times 10^{-9}$   | -                       | 0.17           | -                             | 0.23                  |
| rs10195252                              | 2   | 165,513,091        | <i>GRB14*</i>              | T/C                                             | $4.9 \times 10^{-10}$  | +                       | 0.98           | -                             | 0.28                  |
| rs1421085                               | 16  | 53,800,954         | <i>FTO</i>                 | C/T                                             | $1.9 \times 10^{-15}$  | -                       | 0.01           | -                             | 0.37                  |
| rs4865796                               | 5   | 53,272,664         | <i>ARL15</i>               | A/G                                             | $2.1 \times 10^{-8}$   | -                       | 0.91           | -                             | 0.40                  |
| rs983309                                | 8   | 9,177,732          | <i>PPP1R3B*</i>            | T/G                                             | $3.8 \times 10^{-14}$  | +                       | 0.33           | +                             | 0.52                  |
| rs2745353                               | 6   | 127,452,935        | <i>RSPO3</i>               | T/C                                             | $5.5 \times 10^{-9}$   | -                       | 0.24           | -                             | 0.50                  |
| rs9884482                               | 4   | 106,081,636        | <i>TET2</i>                | C/T                                             | $1.4 \times 10^{-11}$  | -                       | 0.81           | -                             | 0.64                  |
| rs1167800                               | 7   | 75,176,196         | <i>HIP1</i>                | A/G                                             | $2.6 \times 10^{-9}$   | -                       | 0.77           | +                             | 0.91                  |
| rs1530559                               | 2   | 135,755,629        | <i>YSK4</i>                | A/G                                             | $3.4 \times 10^{-8}$   | -                       | 0.73           | -                             | 0.92                  |
| <b>Fasting insulin adjusted for BMI</b> |     |                    |                            |                                                 |                        |                         |                |                               |                       |
| rs3822072                               | 4   | 89,741,269         | <i>FAM13A</i>              | A/G                                             | $1.8 \times 10^{-8}$   | -                       | 0.04           | -                             | 0.02                  |
| rs2943645                               | 2   | 227,099,180        | <i>IRS1</i>                | T/C                                             | $2.3 \times 10^{-19}$  | -                       | 0.54           | -                             | 0.06                  |
| rs6912327                               | 6   | 34,764,922         | <i>UHRF1BP1</i>            | T/C                                             | $2.3 \times 10^{-8}$   | +                       | 0.07           | +                             | 0.09                  |
| rs731839                                | 19  | 33,899,065         | <i>PEPD</i>                | G/A                                             | $5.1 \times 10^{-12}$  | +                       | 0.04           | +                             | 0.12                  |
| rs459193                                | 5   | 55,806,751         | <i>ANKRD55-<br/>MAP3K1</i> | G/A                                             | $1.12 \times 10^{-10}$ | -                       | 0.18           | -                             | 0.16                  |
| rs6822892                               | 4   | 157,734,675        | <i>PDGFC</i>               | A/G                                             | $2.6 \times 10^{-10}$  | -                       | 0.03           | -                             | 0.18                  |
| rs17036328                              | 3   | 12,390,484         | <i>PPARG</i>               | T/C                                             | $3.6 \times 10^{-12}$  | -                       | 0.68           | -                             | 0.21                  |
| rs2126259                               | 8   | 9,185,146          | <i>PPP1R3B</i>             | T/C                                             | $3.3 \times 10^{-13}$  | +                       | 0.27           | +                             | 0.26                  |
| rs10195252                              | 2   | 165,513,091        | <i>GRB14*</i>              | T/C                                             | $1.3 \times 10^{-16}$  |                         |                |                               |                       |
| rs4846565                               | 1   | 219,722,104        | <i>LYPLAL1</i>             | G/A                                             | $1.8 \times 10^{-9}$   | -                       | 0.47           | -                             | 0.35                  |
| rs4865796                               | 5   | 53,272,664         | <i>ARL15</i>               | A/G                                             | $2.2 \times 10^{-12}$  | -                       | 0.91           | -                             | 0.40                  |
| rs974801                                | 4   | 106,071,064        | <i>TET2</i>                | G/A                                             | $3.3 \times 10^{-11}$  | -                       | 0.97           | -                             | 0.78                  |
| <b>Fasting glucose</b>                  |     |                    |                            |                                                 |                        |                         |                |                               |                       |
| rs11715915                              | 3   | 49,455,330         | <i>AMT</i>                 | C/T                                             | $4.9 \times 10^{-8}$   | -                       | 0.01           | -                             | $4.24 \times 10^{-3}$ |
| rs10747083                              | 12  | 133,041,618        | <i>P2RX2</i>               | A/G                                             | $7.6 \times 10^{-9}$   | -                       | 0.01           | -                             | 0.03                  |

|                                         |    |             |                 |     |                       |   |      |   |      |
|-----------------------------------------|----|-------------|-----------------|-----|-----------------------|---|------|---|------|
| rs9368222                               | 6  | 20,686,996  | <i>CDKAL1</i>   | A/C | $1 \times 10^{-9}$    | + | 0.02 | + | 0.05 |
| rs2302593                               | 19 | 46,196,634  | <i>GIPR</i>     | C/G | $9.3 \times 10^{-10}$ | + | 0.67 | + | 0.14 |
| rs6113722                               | 20 | 22,557,099  | <i>FOXA2</i>    | G/A | $2.5 \times 10^{-11}$ | - | 0.72 | - | 0.24 |
| rs11619319                              | 13 | 28,487,599  | <i>PDX1</i>     | G/A | $1.3 \times 10^{-15}$ | - | 0.54 | - | 0.28 |
| rs11603334                              | 11 | 72,432,985  | <i>ARAP1</i>    | G/A | $1.1 \times 10^{-11}$ | + | 0.88 | - | 0.38 |
| rs10811661                              | 9  | 22,134,094  | <i>CDKN2B</i>   | T/C | $5.6 \times 10^{-18}$ | + | 0.57 | + | 0.39 |
| rs7651090                               | 3  | 185,513,392 | <i>IGF2BP2</i>  | G/A | $1.75 \times 10^{-8}$ | - | 0.40 | + | 0.44 |
| rs983309                                | 8  | 9,177,732   | <i>PPP1R3B*</i> | T/G | $6.3 \times 10^{-15}$ | + | 0.33 | + | 0.52 |
| rs6072275                               | 20 | 39,743,905  | <i>TOP1</i>     | A/G | $1.7 \times 10^{-8}$  | - | 0.94 | - | 0.58 |
| rs6943153                               | 7  | 50,791,579  | <i>GRB10</i>    | T/C | $1.6 \times 10^{-12}$ | + | 0.47 | + | 0.71 |
| rs3829109                               | 9  | 139,256,766 | <i>DNLZ</i>     | G/A | $1.1 \times 10^{-10}$ | + | 0.56 | - | 0.89 |
| rs4869272                               | 5  | 95,539,448  | <i>PCSK1*</i>   | T/C | $1 \times 10^{-15}$   | + | 0.68 | + | 0.75 |
| rs16913693                              | 9  | 111,680,359 | <i>IKBKAP</i>   | T/G | $3.5 \times 10^{-11}$ | - | 0.95 | + | 0.99 |
| rs3783347                               | 14 | 100,839,261 | <i>WARS</i>     | G/T | $1.3 \times 10^{-10}$ | + | 0.83 | - | 0.99 |
| rs576674                                | 13 | 33,554,302  | <i>KL</i>       | G/A | $2.3 \times 10^{-8}$  | + | 0.51 | + | 0.94 |
| <b>Fasting glucose adjusted for BMI</b> |    |             |                 |     |                       |   |      |   |      |
| rs17762454                              | 6  | 7,213,200   | <i>RREB1</i>    | T/C | $9.6 \times 10^{-9}$  | + | 0.18 | + | 0.03 |
| rs2657879                               | 12 | 56,865,338  | <i>GLS2</i>     | G/A | $3.9 \times 10^{-8}$  | + | 0.44 | + | 0.64 |
| rs7708285                               | 5  | 76,425,867  | <i>ZBED3</i>    | G/A | $1.2 \times 10^{-8}$  | - | 0.73 | + | 0.67 |
| <b>2hr glucose</b>                      |    |             |                 |     |                       |   |      |   |      |
| rs6975024                               | 7  | 44,231,886  | <i>GCK</i>      | C/T | $5.2 \times 10^{-11}$ | + | 0.07 | + | 0.04 |
| rs11782386                              | 8  | 9,201,787   | <i>PPP1R3B*</i> | C/T | $2.2 \times 10^{-9}$  | - | 0.02 | - | 0.07 |
| rs1019503                               | 5  | 96,254,817  | <i>ERAP2</i>    | A/G | $8.9 \times 10^{-9}$  | - | 0.15 | - | 0.48 |
| <b>2hr glucose adjusted for BMI</b>     |    |             |                 |     |                       |   |      |   |      |
| rs7651090                               | 3  | 185,513,392 | <i>IGF2BP2</i>  | G/A | $4.5 \times 10^{-8}$  | - | 0.40 | + | 0.44 |

\*The effect directions on clamp-measured insulin sensitivity were reported on the glycemic trait-raising alleles as reported in Scott et al (2012) (43). Scott et al (2012) reported 53 glycemic loci in total, only 48 passed quality control for imputation data in our study.

**Supplementary Table 4:** Association of previously known glycemic trait loci with insulin sensitivity

| SNP        | Chr | T2D effect allele | Risk allele frequency | Combined_OR (95% CI) | Combine d_p-value | Locus          | Insulin sensitivity effect | stder  | insulin sensitivity p_value | direction |
|------------|-----|-------------------|-----------------------|----------------------|-------------------|----------------|----------------------------|--------|-----------------------------|-----------|
| rs10923931 | 1   | T                 | [0.09-0.14]           | 1.08 (1.04-1.12)     | 1.3E-05           | <i>NOTCH2</i>  | 0.0225                     | 0.0493 | 0.649                       | -+--      |
| rs2075423  | 1   | G                 | [0.55-0.69]           | 1.07 (1.05-1.10)     | 8.1E-09           | <i>PROX1</i>   | 0.0226                     | 0.028  | 0.4199                      | +---      |
| rs340874   | 1   | C                 | [0.50-0.59]           | 1.07 (1.04-1.09)     | 1.1E-07           |                | 0.0095                     | 0.0266 | 0.72                        | ++--      |
| rs780094   | 2   | C                 | [0.56-0.66]           | 1.06 (1.04-1.09)     | 5.4E-07           | <i>GCKR</i>    | -0.0086                    | 0.0282 | 0.7588                      | ++--      |
| rs10203174 | 2   | C                 | [0.88-0.94]           | 1.14 (1.10-1.19)     | 9.5E-12           | <i>THADA</i>   | -0.0682                    | 0.0461 | 0.1394                      | +---      |
| rs11899863 | 2   | C                 | [0.89-0.95]           | 1.15 (1.10-1.20)     | 9.5E-11           |                | -0.103                     | 0.0498 | 0.03858                     | +---      |
| rs243088   | 2   | T                 | [0.45-0.48]           | 1.07 (1.04-1.09)     | 1.8E-08           | <i>BCL11A</i>  | -0.0152                    | 0.0267 | 0.5683                      | ++--      |
| rs243021   | 2   | A                 | [0.44-0.49]           | 1.09 (1.05-1.13)     | 5.3E-06           |                | 0.0089                     | 0.0266 | 0.7365                      | ++++      |
| rs243019   | 2   | C                 | [0.44-0.49]           | 1.07 (1.04-1.09)     | 2.2E-08           |                | 0.0089                     | 0.0266 | 0.7383                      | ++--      |
| rs7569522  | 2   | A                 | [0.43-0.47]           | 1.05 (1.03-1.07)     | 4.1E-05           | <i>RBMS1</i>   | -0.0059                    | 0.0274 | 0.8296                      | ++--      |
| rs7593730  | 2   | C                 | [0.76-0.82]           | 1.11 (1.06-1.15)     | 1.5E-06           |                | -0.0078                    | 0.0331 | 0.8128                      | ++--      |
| rs4410242  | 2   | G                 | [0.77-0.82]           | 1.04 (1.01-1.07)     | 1.4E-02           |                | -0.0085                    | 0.0332 | 0.7977                      | ++--      |
| rs13389219 | 2   | C                 | [0.52-0.65]           | 1.07 (1.05-1.10)     | 1.0E-08           | <i>GRB14</i>   | -0.0218                    | 0.0282 | 0.4398                      | ++++      |
| rs3923113  | 2   | A                 | [0.57-0.69]           | 1.07 (1.05-1.10)     | 3.3E-08           |                | -0.0381                    | 0.0287 | 0.1842                      | ++--      |
| rs2943640  | 2   | C                 | [0.61-0.66]           | 1.10 (1.07-1.12)     | 2.7E-14           | <i>IRS1</i>    | -0.0489                    | 0.0275 | 0.07472                     | ++++      |
| rs7578326  | 2   | A                 | [0.62-0.68]           | 1.08 (1.06-1.11)     | 3.8E-10           |                | -0.0659                    | 0.0284 | 0.02018                     | ---+      |
| rs1801282  | 3   | C                 | [0.82-0.90]           | 1.13 (1.09-1.17)     | 1.1E-12           | <i>PPARG</i>   | -0.0584                    | 0.0408 | 0.1521                      | ---+      |
| rs13081389 | 3   | A                 | [0.90-0.95]           | 1.12 (1.07-1.18)     | 8.2E-07           |                | -0.0629                    | 0.0538 | 0.2421                      | ++++      |
| rs1496653  | 3   | A                 | [0.66-0.83]           | 1.09 (1.06-1.12)     | 3.6E-09           | <i>UBE2E2</i>  | 0.0042                     | 0.0329 | 0.8977                      | ++--      |
| rs7612463  | 3   | C                 | [0.82-0.89]           | 1.10 (1.04-1.16)     | 9.8E-04           |                | 0.0576                     | 0.041  | 0.1597                      | ---+      |
| rs12497268 | 3   | G                 | [0.75-0.85]           | 1.03 (1.01-1.07)     | 2.1E-02           | <i>PSMD6</i>   | -0.0429                    | 0.034  | 0.2062                      | ++--      |
| rs831571   | 3   | C                 | [0.80-0.82]           | 1.03 (0.99-1.08)     | 1.8E-01           |                | -0.0459                    | 0.0343 | 0.1815                      | ++++      |
| rs13059603 | 3   | A                 | [0.72-0.77]           | 1.00 (0.97-1.03)     | 8.7E-01           |                | -0.0544                    | 0.0313 | 0.08282                     | ---+      |
| rs6795735  | 3   | C                 | [0.54-0.65]           | 1.08 (1.06-1.11)     | 7.4E-11           | <i>ADAMTS9</i> | 0.0254                     | 0.0271 | 0.3501                      | ---+      |
| rs11717195 | 3   | T                 | [0.74-0.82]           | 1.11 (1.08-1.14)     | 6.5E-14           | <i>ADCY5</i>   | -0.0301                    | 0.0327 | 0.3583                      | ++++      |
| rs11708067 | 3   | A                 | [0.74-0.83]           | 1.11 (1.08-1.14)     | 7.2E-14           |                | -0.0416                    | 0.033  | 0.2079                      | ++++      |
| rs4402960  | 3   | T                 | [0.27-0.33]           | 1.13 (1.10-1.16)     | 2.4E-23           | <i>IGF2BP2</i> | 0.023                      | 0.0296 | 0.4375                      | ++--      |
| rs1470579  | 3   | C                 | [0.28-0.33]           | 1.12 (1.08-1.16)     | 7.5E-11           |                | 0.0165                     | 0.0295 | 0.575                       | ++--      |
| rs6769511  | 3   | C                 | [0.28-0.33]           | 1.13 (1.10-1.16)     | 2.0E-21           |                | 0.0167                     | 0.0295 | 0.5718                      | ++--      |
| rs17301514 | 3   | A                 | [0.09-0.15]           | 1.05 (1.01-1.09)     | 1.4E-02           | <i>ST6GAL1</i> | 0.0171                     | 0.0413 | 0.6795                      | ++--      |

|            |   |   |             |                  |         |          |         |        |         |      |
|------------|---|---|-------------|------------------|---------|----------|---------|--------|---------|------|
| rs16861329 | 3 | C | [0.84-0.89] | 1.03 (0.93-1.10) | 4.1E-01 |          | 0.0527  | 0.0413 | 0.2016  | ---+ |
| rs6819243  | 4 | T | [0.95-0.99] | 1.07 (1.01-1.14) | 3.0E-02 | MAEA     | 0.1138  | 0.0758 | 0.1333  | +++- |
| rs6815464  | 4 | - | -           | -                | -       |          | 0.0967  | 0.0767 | 0.2077  | ---+ |
| rs4458523  | 4 | G | [0.56-0.63] | 1.10 (1.07-1.12) | 2.0E-15 | WFS1     | 0.0107  | 0.0282 | 0.7041  | ---+ |
| rs1801214  | 4 | T | [0.54-0.64] | 1.10 (1.08-1.13) | 3.3E-15 |          | 0.0093  | 0.0284 | 0.7444  | ---+ |
| rs459193   | 5 | G | [0.68-0.76] | 1.08 (1.05-1.11) | 6.0E-09 | ANKRD55  | -0.0439 | 0.0311 | 0.1579  | +++  |
| rs6878122  | 5 | G | [0.08-0.32] | 1.10 (1.07-1.13) | 5.0E-11 | ZBED3    | 0.0136  | 0.0324 | 0.6746  | +++  |
| rs4457053  | 5 | G | [0.10-0.33] | 1.09 (1.06-1.12) | 1.8E-10 |          | 0.0118  | 0.0328 | 0.7182  | +++  |
| rs7756992  | 6 | G | [0.23-0.34] | 1.17 (1.14-1.20) | 7.0E-35 | CDKAL1   | 0.0519  | 0.0294 | 0.07682 | ---- |
| rs10440833 | 6 | A | [0.23-0.34] | 1.22 (1.17-1.27) | 3.6E-22 |          | 0.0592  | 0.0297 | 0.04621 | ++++ |
| rs9368222  | 6 | A | [0.23-0.34] | 1.17 (1.14-1.20) | 7.0E-34 |          | 0.0574  | 0.0297 | 0.05322 | ++++ |
| rs4299828  | 6 | A | [0.78-0.83] | 1.04 (1.01-1.07) | 1.1E-02 | ZFAND3   | 0.0449  | 0.0328 | 0.1713  | +++  |
| rs9470794  | 6 | T | [0.87-0.94] | 1.01 (0.94-1.08) | 8.1E-01 |          | 0.0347  | 0.0482 | 0.471   | ---+ |
| rs3734621  | 6 | C | [0.02-0.04] | 1.07 (1.00-1.15) | 6.6E-02 | KCNK16   | -0.0414 | 0.0807 | 0.608   | +++  |
| rs1535500  | 6 | - | -           | -                | -       |          | -0.0085 | 0.0267 | 0.7507  | +++  |
| rs17168486 | 7 | T | [0.12-0.22] | 1.11 (1.07-1.14) | 5.9E-11 | DGKB     | -0.0414 | 0.0358 | 0.2477  | ---- |
| rs6960043  | 7 | C | [0.51-0.57] | 1.06 (1.04-1.09) | 3.4E-07 |          | -0.0291 | 0.0272 | 0.2857  | +++  |
| rs2191349  | 7 | T | [0.44-0.50] | 1.05 (1.03-1.08) | 3.0E-05 |          | -0.032  | 0.0275 | 0.245   | ---+ |
| rs849135   | 7 | G | [0.50-0.53] | 1.11 (1.08-1.13) | 3.1E-17 | JAZF1    | -0.0072 | 0.0273 | 0.7915  | ++++ |
| rs849134   | 7 | A | [0.47-0.50] | 1.12 (1.08-1.16) | 3.2E-10 |          | -0.0045 | 0.0273 | 0.8688  | +--- |
| rs10278336 | 7 | A | [0.50-0.72] | 1.07 (1.04-1.10) | 6.4E-06 | GCK      | 0.0376  | 0.0295 | 0.2018  | +++  |
| rs4607517  | 7 | A | [0.10-0.19] | 1.08 (1.04-1.11) | 1.0E-05 |          | 0.0749  | 0.0378 | 0.04783 | ++++ |
| rs17867832 | 7 | T | [0.89-0.91] | 1.09 (1.03-1.15) | 1.9E-03 | GCC1     | 0.0377  | 0.0533 | 0.4789  | +++  |
| rs6467136  | 7 | A | [0.42-0.49] | 1.01 (0.97-1.05) | 5.5E-01 |          | -0.0282 | 0.027  | 0.296   | +--- |
| rs13233731 | 7 | G | [0.50-0.56] | 1.05 (1.02-1.07) | 2.3E-04 | KLF14    | -0.0134 | 0.0273 | 0.6245  | +++  |
| rs972283   | 7 | G | [0.50-0.56] | 1.04 (1.02-1.07) | 6.0E-04 |          | -0.0178 | 0.0278 | 0.5219  | +++  |
| rs516946   | 8 | C | [0.72-0.81] | 1.09 (1.06-1.12) | 2.5E-10 | ANK1     | 0.0219  | 0.0318 | 0.4914  | +++  |
| rs7845219  | 8 | T | [0.50-0.55] | 1.06 (1.03-1.08) | 4.6E-06 | TP53INP1 | 0.0202  | 0.0269 | 0.4523  | +++  |
| rs896854   | 8 | T | [0.46-0.50] | 1.05 (1.03-1.08) | 2.1E-05 |          | -0.025  | 0.032  | 0.4348  | --?? |
| rs3802177  | 8 | G | [0.60-0.91] | 1.14 (1.11-1.17) | 1.3E-21 | SLC30A8  | -0.0433 | 0.0295 | 0.1423  | ++++ |
| rs10758593 | 9 | A | [0.40-0.46] | 1.06 (1.04-1.09) | 2.6E-07 | GLIS3    | 0.0122  | 0.0273 | 0.6538  | 0-+- |
| rs7041847  | 9 | A | [0.50-0.53] | 1.04 (1.02-1.07) | 7.2E-04 |          | -0.015  | 0.027  | 0.5791  | ---+ |
| rs16927668 | 9 | T | [0.19-0.26] | 1.04 (1.01-1.07) | 2.8E-03 | PTPRD    | 0.0623  | 0.0324 | 0.05439 | ++++ |

|            |    |   |             |                  |          |                   |         |        |         |      |
|------------|----|---|-------------|------------------|----------|-------------------|---------|--------|---------|------|
| rs17584499 | 9  | T | [0.05-0.24] | 1.00 (0.95-1.06) | 9.4E-01  |                   | 0.0195  | 0.0366 | 0.5936  | +++  |
| rs10811661 | 9  | T | [0.81-0.84] | 1.18 (1.15-1.22) | 3.7E-27  | CDKN2A/B          | 0.0313  | 0.0361 | 0.386   | +++  |
| rs944801   | 9  | C | [0.54-0.62] | 1.08 (1.05-1.10) | 2.4E-09  |                   | -0.042  | 0.0274 | 0.1258  | ---- |
| rs10965250 | 9  | G | [0.82-0.85] | 1.19 (1.15-1.23) | 1.8E-25  |                   | 0.0296  | 0.0359 | 0.41    | -++  |
| rs17791513 | 9  | A | [0.87-0.96] | 1.12 (1.07-1.17) | 2.8E-07  | TLE4              | 0.0142  | 0.0549 | 0.7962  | ++-  |
| rs13292136 | 9  | C | [0.86-0.94] | 1.19 (1.11-1.27) | 8.5E-07  |                   | -0.0044 | 0.0534 | 0.934   | ---+ |
| rs2796441  | 9  | G | [0.59-0.91] | 1.07 (1.05-1.10) | 5.4E-09  | TLE1              | 0.0161  | 0.0276 | 0.5602  | ---+ |
| rs11257655 | 10 | T | [0.20-0.25] | 1.07 (1.04-1.10) | 2.1E-06  | CDC123/CA<br>MK1D | 0.0032  | 0.0335 | 0.9229  | +++  |
| rs12779790 | 10 | G | [0.17-0.23] | 1.08 (1.03-1.13) | 1.2E-03  |                   | 0.0184  | 0.035  | 0.5979  | ---  |
| rs12242953 | 10 | G | [0.91-0.95] | 1.07 (1.02-1.12) | 3.9E-03  | VPS26A            | -0.0541 | 0.0567 | 0.3398  | +++  |
| rs1802295  | 10 | T | [0.27-0.36] | 1.00 (0.98-1.03) | 8.0E-01  |                   | 0.0112  | 0.0294 | 0.7044  | -++  |
| rs12571751 | 10 | A | [0.52-0.56] | 1.08 (1.05-1.10) | 1.0E-10  | ZMIZ1             | 0.0105  | 0.0273 | 0.7019  | +--- |
| rs1111875  | 10 | C | [0.53-0.63] | 1.11 (1.09-1.14) | 2.0E-19  | HHEX/IDE          | -0.0117 | 0.0276 | 0.6711  | +    |
| rs5015480  | 10 | C | [0.53-0.62] | 1.15 (1.11-1.19) | 2.2E-16  |                   | -0.0106 | 0.0276 | 0.701   | +    |
| rs7903146  | 10 | T | [0.18-0.38] | 1.39 (1.35-1.42) | 1.2E-139 | TCF7L2            | 0.0373  | 0.0309 | 0.227   | +++  |
| rs2334499  | 11 | T | [0.37-0.45] | 1.04 (1.02-1.06) | 1.2E-03  | DUSP8             | 0.0209  | 0.0317 | 0.5091  | ++?  |
| rs163184   | 11 | G | [0.37-0.49] | 1.09 (1.06-1.11) | 1.2E-11  | KCNQ1             | 0.0416  | 0.0286 | 0.1457  | +    |
| rs231361   | 11 | A | [0.19-0.30] | 1.09 (1.06-1.12) | 1.2E-09  |                   | -0.0501 | 0.0306 | 0.1015  | ---  |
| rs231362   | 11 | G | [0.44-0.50] | 1.08 (1.05-1.11) | 1.7E-09  |                   | -0.0497 | 0.0272 | 0.06774 | ++   |
| rs5215     | 11 | C | [0.35-0.46] | 1.07 (1.05-1.10) | 8.5E-10  | KCNJ11            | -0.0406 | 0.0277 | 0.1431  | +++  |
| rs1552224  | 11 | A | [0.76-0.87] | 1.11 (1.07-1.14) | 1.8E-10  | ARAP1<br>(CENTD2) | -0.0294 | 0.0362 | 0.4172  | ---- |
| rs10830963 | 11 | G | [0.22-0.34] | 1.10 (1.07-1.13) | 5.3E-13  | MTNR1B            | -0.0038 | 0.0318 | 0.9042  | +++  |
| rs1387153  | 11 | T | [0.21-0.32] | 1.09 (1.06-1.12) | 1.6E-11  |                   | 0.0189  | 0.0325 | 0.5612  | +++  |
| rs11063069 | 12 | G | [0.19-0.27] | 1.08 (1.05-1.11) | 3.3E-07  | CCND2             | -0.0183 | 0.0344 | 0.5955  | +--  |
| rs10842994 | 12 | C | [0.75-0.92] | 1.10 (1.06-1.13) | 6.1E-10  | KLHDC5            | 0.0493  | 0.0351 | 0.1603  | ---+ |
| rs2261181  | 12 | T | [0.06-0.13] | 1.13 (1.08-1.17) | 1.2E-09  | HMGA2             | -0.1194 | 0.0492 | 0.01511 | ---- |
| rs1531343  | 12 | C | [0.07-0.13] | 1.15 (1.09-1.22) | 4.9E-07  |                   | -0.1159 | 0.0486 | 0.01711 | ---- |
| rs2612035  | 12 | G | [0.06-0.12] | 1.12 (1.08-1.17) | 3.0E-09  |                   | -0.1188 | 0.0487 | 0.01471 | ++++ |
| rs7955901  | 12 | C | [0.42-0.49] | 1.07 (1.05-1.10) | 6.5E-09  | TSPAN8/LGR<br>5   | -0.0248 | 0.0275 | 0.3668  | +--- |
| rs4760790  | 12 | A | [0.21-0.30] | 1.10 (1.05-1.14) | 8.0E-06  |                   | 0.0254  | 0.0307 | 0.4074  | +++  |
| rs4760915  | 12 | T | [0.21-0.30] | 1.06 (1.03-1.09) | 1.1E-05  |                   | 0.0265  | 0.0307 | 0.3878  | +++  |
| rs12427353 | 12 | G | [0.72-0.83] | 1.08 (1.05-1.12) | 6.5E-08  | HNF1A             | 0.0158  | 0.0339 | 0.6412  | +    |

|            |    |   |             |                  |         |                 |         |        |         |       |
|------------|----|---|-------------|------------------|---------|-----------------|---------|--------|---------|-------|
| rs7957197  | 12 | T | [0.73-0.83] | 1.08 (1.05-1.11) | 3.3E-07 | (TCF1)          | 0.0155  | 0.0337 | 0.6455  | +---  |
| rs1359790  | 13 | G | [0.69-0.77] | 1.08 (1.05-1.10) | 1.4E-08 | SPRY2           | 0.0129  | 0.0301 | 0.6688  | +--+  |
| rs4502156  | 15 | T | [0.51-0.61] | 1.06 (1.03-1.08) | 2.3E-06 | C2CD4A          | 0.0339  | 0.0275 | 0.2177  | ++++  |
| rs7163757  | 15 | C | [0.50-0.61] | 1.06 (1.02-1.10) | 1.3E-03 |                 | 0.0518  | 0.0273 | 0.05746 | ----  |
| rs7177055  | 15 | A | [0.68-0.73] | 1.08 (1.05-1.10) | 4.6E-09 | HMG20A          | -0.0169 | 0.0293 | 0.5633  | ---+  |
| rs7178572  | 15 | G | [0.66-0.71] | 1.07 (1.05-1.10) | 2.2E-08 |                 | -0.0191 | 0.0291 | 0.5121  | +--+  |
| rs11634397 | 15 | G | [0.61-0.68] | 1.05 (1.02-1.07) | 1.4E-04 | ZFAND6          | 0.0585  | 0.0281 | 0.03754 | ---+  |
| rs2007084  | 15 | G | [0.88-0.93] | 1.02 (0.98-1.07) | 3.6E-01 | AP3S2           | -0.0333 | 0.0572 | 0.5601  | ---+  |
| rs2028299  | 15 | C | [0.24-0.30] | 1.04 (1.00-1.09) | 4.4E-02 |                 | -0.0244 | 0.0306 | 0.4256  | ++-+  |
| rs12899811 | 15 | G | [0.29-0.34] | 1.08 (1.05-1.10) | 6.3E-09 | PRC1            | 0.0018  | 0.0291 | 0.9502  | +--+  |
| rs8042680  | 15 | A | [0.28-0.35] | 1.07 (1.04-1.09) | 1.9E-07 |                 | 0.0126  | 0.0288 | 0.6612  | -++-  |
| rs9936385  | 16 | C | [0.36-0.41] | 1.13 (1.10-1.16) | 2.6E-23 | FTO             | -0.0235 | 0.0272 | 0.3879  | ++--  |
| rs11642841 | 16 | A | [0.39-0.44] | 1.12 (1.09-1.14) | 1.1E-19 |                 | -0.0557 | 0.029  | 0.0551  | ---+  |
| rs7202877  | 16 | T | [0.86-0.92] | 1.12 (1.07-1.16) | 3.5E-08 | BCAR1           | 0.0072  | 0.0457 | 0.875   | +--+  |
| rs2447090  | 17 | A | [0.57-0.67] | 1.04 (1.01-1.06) | 3.8E-03 | SRR             | -0.0416 | 0.0288 | 0.1483  | ---+  |
| rs391300   | 17 | T | [0.34-0.40] | 1.01 (0.99-1.04) | 3.9E-01 |                 | -0.0342 | 0.0298 | 0.2511  | +---  |
| rs11651052 | 17 | A | -           | 1.10 (1.07-1.14) | 2.0E-11 | HNF1B<br>(TCF2) | 0.0155  | 0.0277 | 0.5759  | ++++  |
| rs4430796  | 17 | G | [0.50-0.66] | 1.13 (1.07-1.19) | 2.4E-06 |                 | 0.0087  | 0.0277 | 0.7541  | -+--  |
| rs11651755 | 17 | C | -           | 1.10 (1.07-1.13) | 1.8E-10 |                 | 0.0103  | 0.0275 | 0.7075  | ----  |
| rs12970134 | 18 | A | [0.20-0.30] | 1.08 (1.05-1.11) | 1.2E-08 | MC4R            | 0.0325  | 0.0311 | 0.2959  | ++++  |
| rs11873305 | 18 | A | [0.03-0.05] | 1.18 (1.11-1.26) | 3.8E-07 |                 | 0.0006  | 0.0685 | 0.9932  | -+--  |
| rs10401969 | 19 | C | [0.03-0.09] | 1.13 (1.09-1.18) | 7.0E-09 | CILP2           | -0.0808 | 0.0562 | 0.1502  | ++??  |
| rs8182584  | 19 | T | [0.34-0.42] | 1.04 (1.01-1.07) | 2.2E-03 | PEPD            | 0.039   | 0.0281 | 0.1646  | +++-  |
| rs3786897  | 19 | A | [0.55-0.61] | 1.03 (1.00-1.05) | 3.7E-02 |                 | 0.0005  | 0.027  | 0.9848  | +---+ |
| rs8108269  | 19 | G | [0.21-0.33] | 1.07 (1.04-1.10) | 4.4E-07 | GIPR            | 0.0423  | 0.0297 | 0.1544  | ----  |
| rs4812829  | 20 | A | [0.13-0.19] | 1.06 (1.03-1.09) | 1.5E-04 | HNF4A           | -0.0617 | 0.0353 | 0.08053 | ----  |

Supplementary Table 5: Primer sequences

|                    | FWD                    | REV                     |
|--------------------|------------------------|-------------------------|
| <i>mNat1</i>       | AGATGCGAGCAGTTCCTTTTG  | CCTGTACTAGAAGGTGGACCATT |
| <i>mNat2</i>       | TCTTGAGCCCCGAACTATTGA  | GCCAACCAAACAATGAACTCCT  |
| <i>Srebf1</i>      | CTCAGCAGCCACCATCTAGCCT | GCTGATGCCTGCAGTCTTCACG  |
| <i>Pparg</i>       | CCATTCTGGCCCACCAAC     | AATGCGAGTGGTCTTCCATCA   |
| <i>Cyclophilin</i> | TTCCAGGATTCATGTGCCAG   | CCATCCAGCCATTCAGTCTT    |
| <i>Cebpa</i>       | GCGGGCAAAGCCAAGAA      | GCGTTCCCGCCGTACC        |
| <i>Adiponectin</i> | GATGGCACTCCTGGAGAGAA   | TCTCCAGGCTCTCCTTTCCT    |
| <i>Leptin</i>      | GAGACCCCTGTGTCTCGGTTT  | CTGCGTGTGTGAAATGTCATTG  |

**Supplementary Figure 1:** The quantile-quantile (QQ) plots of insulin sensitivity in the meta-analysed GWAS

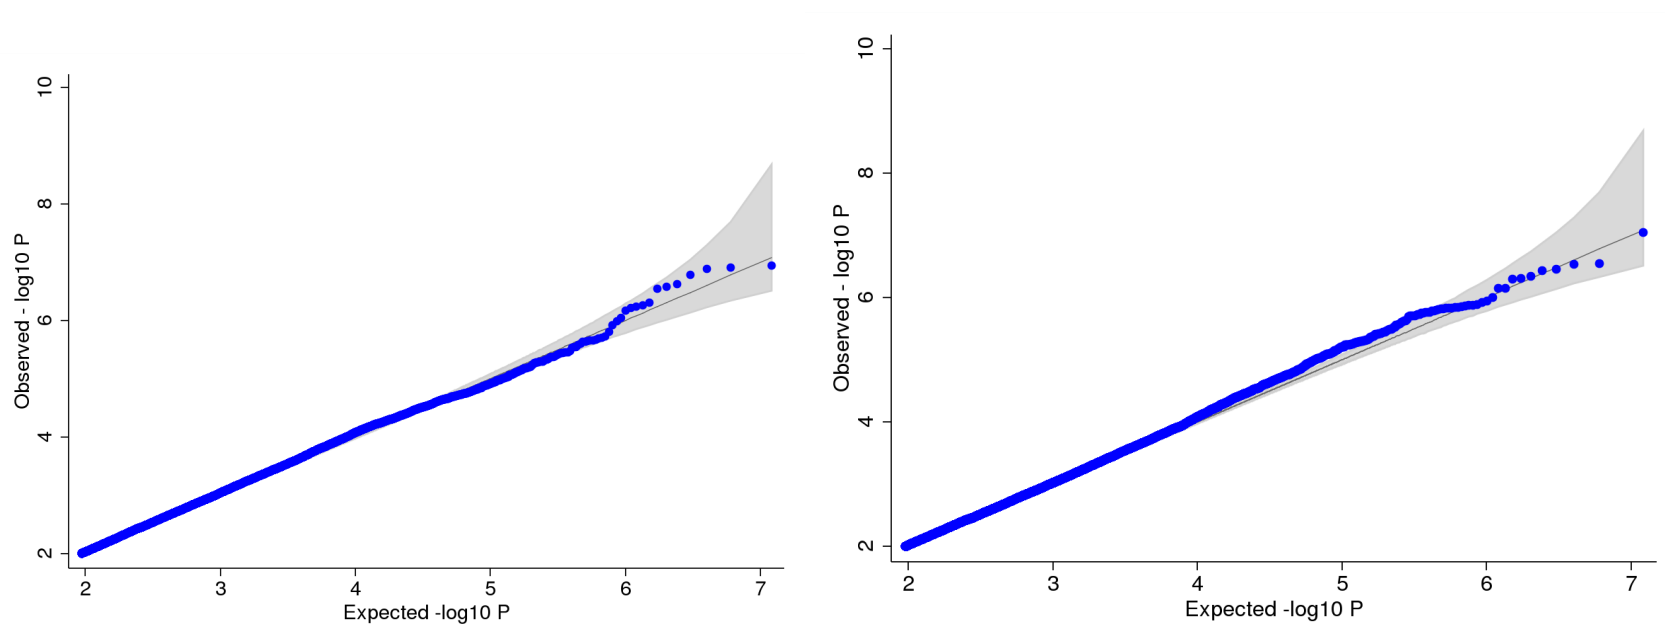

**Left panel:** GWAS results without adjustment for BMI; **Right panel:** GWAS results with adjustment for BMI

The x-axis represents the expected  $-\log_{10} P$ -values. The y-axis represents the observed  $-\log_{10} P$ -values. The observed  $P$ -value for each SNP are sorted and plotted against the expected  $P$ -value in a theoretical  $\chi^2$ -distribution.

**Supplementary Figure 2:** Forest plot excluding small cohort (NaKs) with significant heterogeneity for rs1208 (effect allele “A”, frequency 0.57) in analyses adjusted for age, gender and BMI.

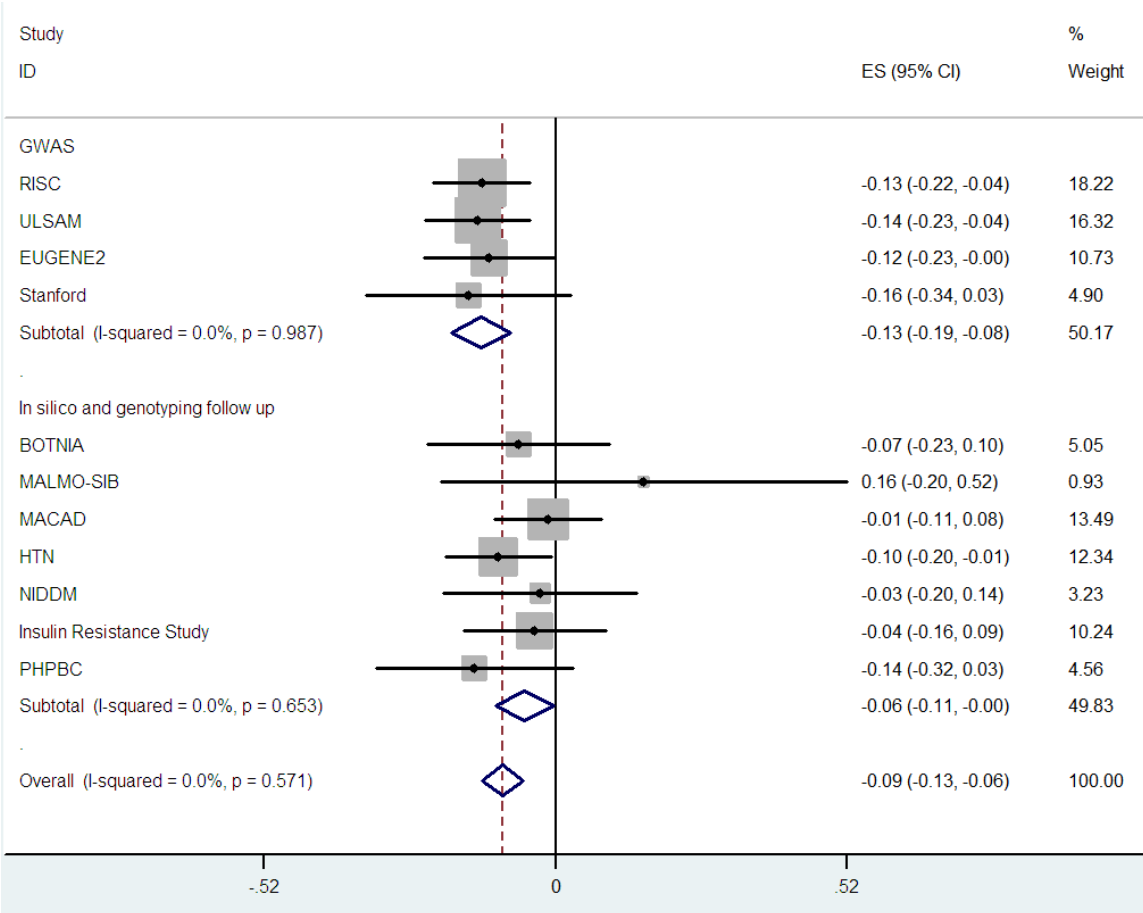

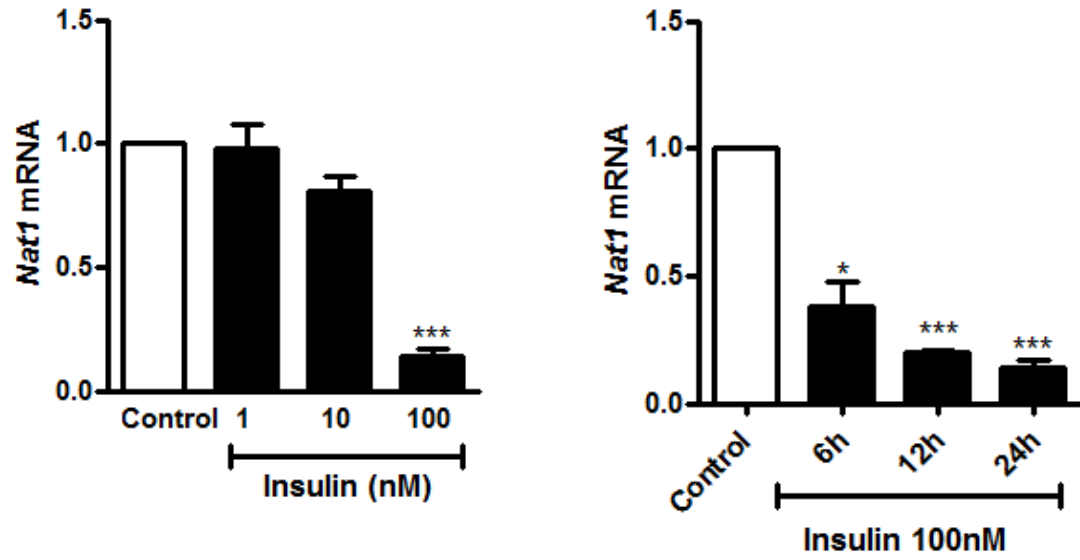

**Supplementary Figure 3:** In 3T3-L1 adipocytes, stimulation with insulin decreases *Nat1* expression levels.

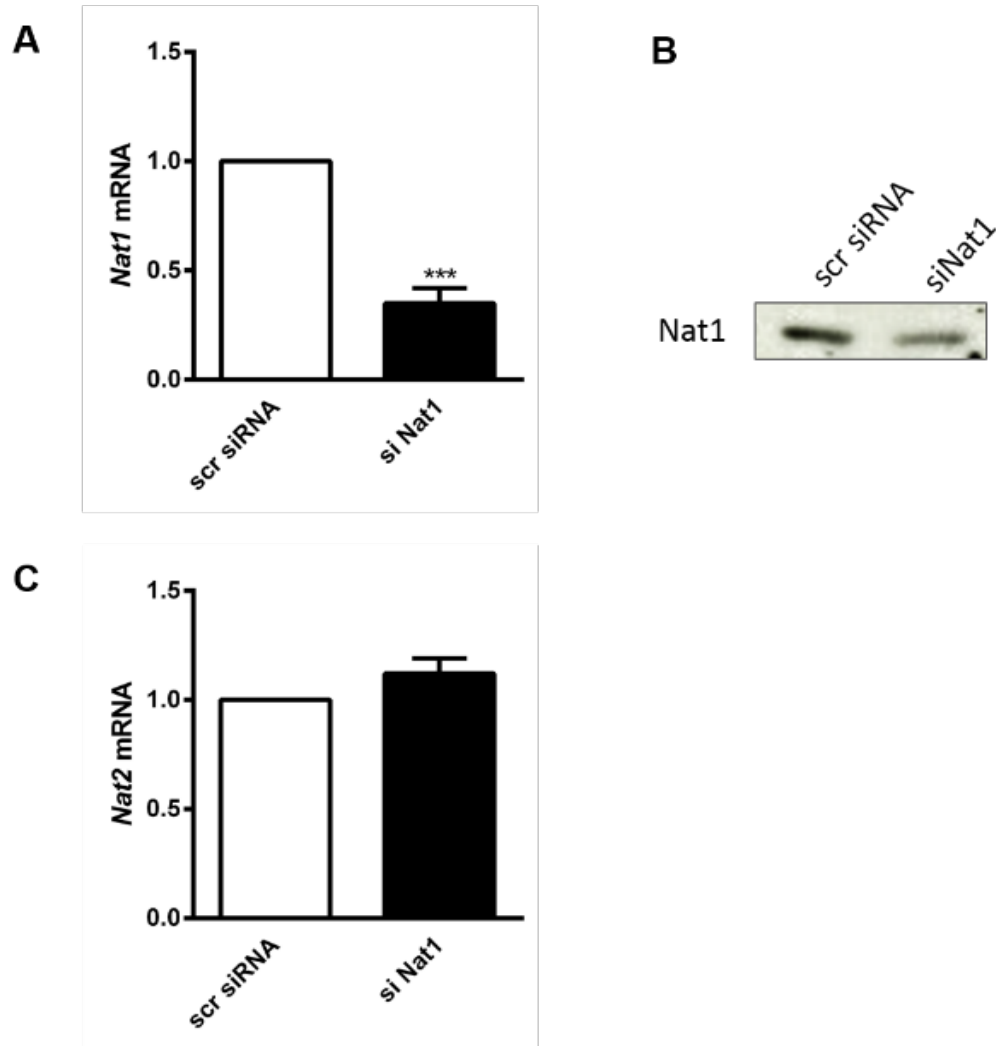

**Supplementary Figure 4:** *Nat1* knockdown in 3T3-L1 adipocytes. Differentiated 3T3-L1 adipocytes were transfected with scrambled siRNA (scr siRNA) or with siRNA against *Nat1* (si *Nat1*). (A) mRNA levels of *Nat1* were analyzed by real-time quantitative PCR, normalized to cyclophilin and expressed relative to scrambled controls. Results represent the mean  $\pm$  SEM of three independent experiments (\*\*\*)  $p \leq 0.001$ . (B) Western blotting analysis of *Nat1* expression in whole cell lysates from 3T3-L1 adipocytes transfected with scr siRNA or with si *Nat1*. (C) mRNA levels of *Nat2* were analyzed by real-time quantitative PCR and expressed relative to scrambled controls.

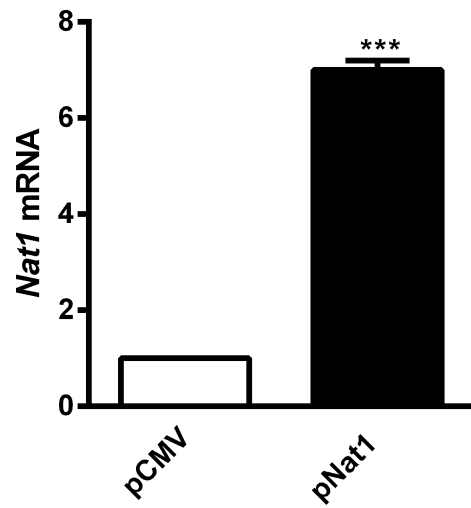

**Supplementary Figure 5:** *Nat1* over expression in 3T3-L1 adipocytes. Differentiated 3T3-L1 adipocytes were transfected with empty vector ( pCMV control) or with expression plasmid for *Nat1* (p *Nat1*). mRNA levels of *Nat1* were analyzed by real-time quantitative PCR, normalized to cyclophilin and expressed relative to controls. Results represent the mean  $\pm$  SEM of three independent experiments (\*\*\*)  $p \leq 0.001$ ).

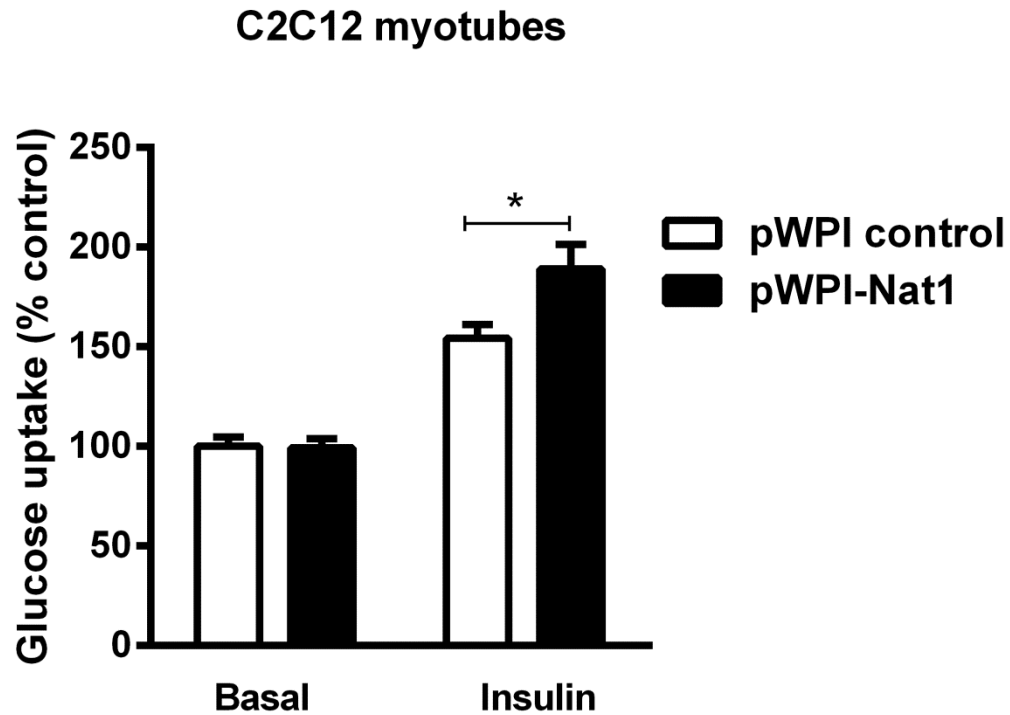

**Supplementary Figure 6:** *Nat1* increased glucose uptake in C2C12 myotubes. C2C12 cells transduced with lenti pWPI (control) and pWPI-Nat1 were differentiated into myotubes. Cells were serum and glucose starved for overnight and the assay was done in the presence or absence of insulin. Radiolabeled glucose in lysates was measured in a high-flashpoint scintillation cocktail using a liquid scintillation counter. Results represent mean  $\pm$  SEM from two separate experiments with 3-4 wells per condition (\*\* $p \leq 0.01$ ).

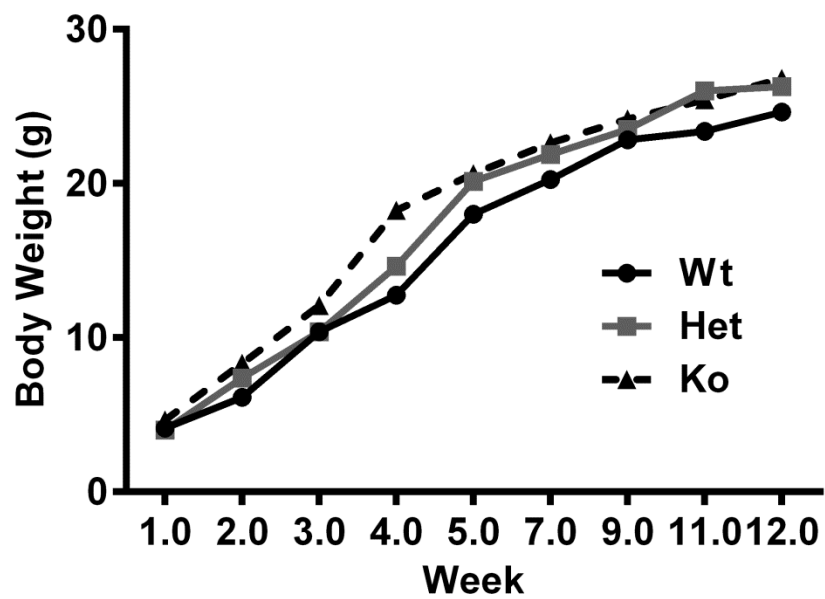

**Supplementary Figure 7:** Body weight was monitored weekly for 12 weeks in male mice ( $n = 10$  per genotype).

**Supplementary Figure 8:** No enrichment of insulin sensitivity associated SNPs identified in the GWAS (age, gender, BMI adjusted analyses) with glycemic or lipid traits. Includes insulin sensitivity SNPs with P values  $< 10^{-3}$  ( $n=185$  SNPs).

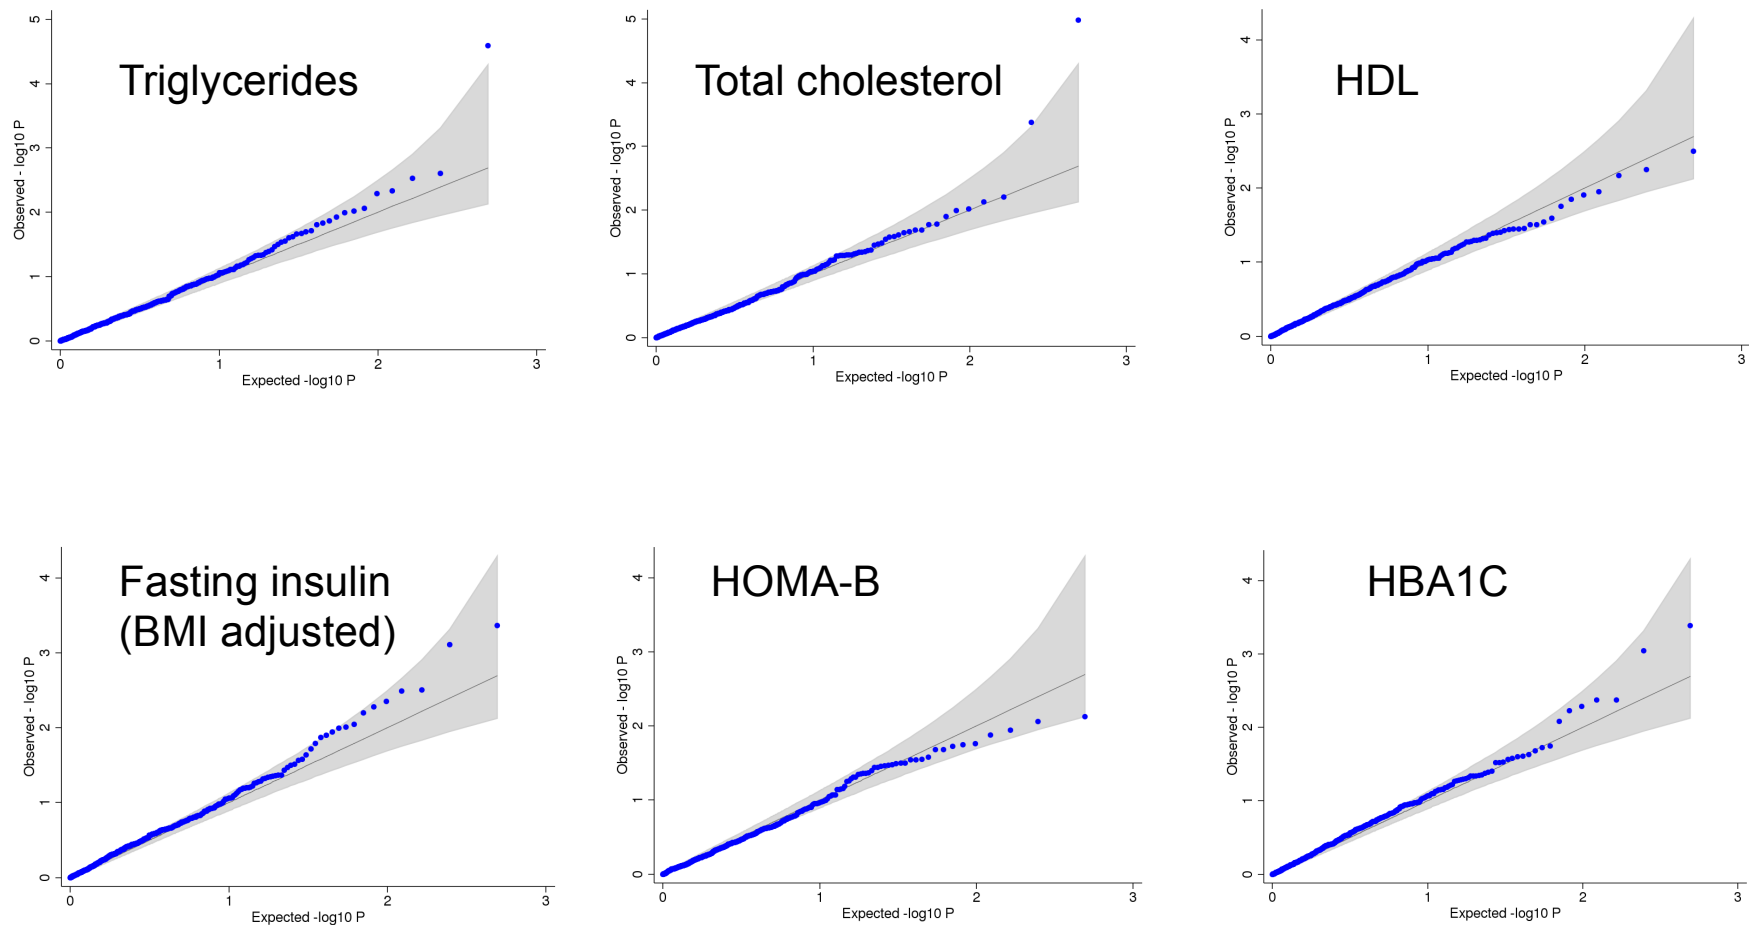

**Supplementary Figure 9:** Association of T2D SNPs with insulin sensitivity

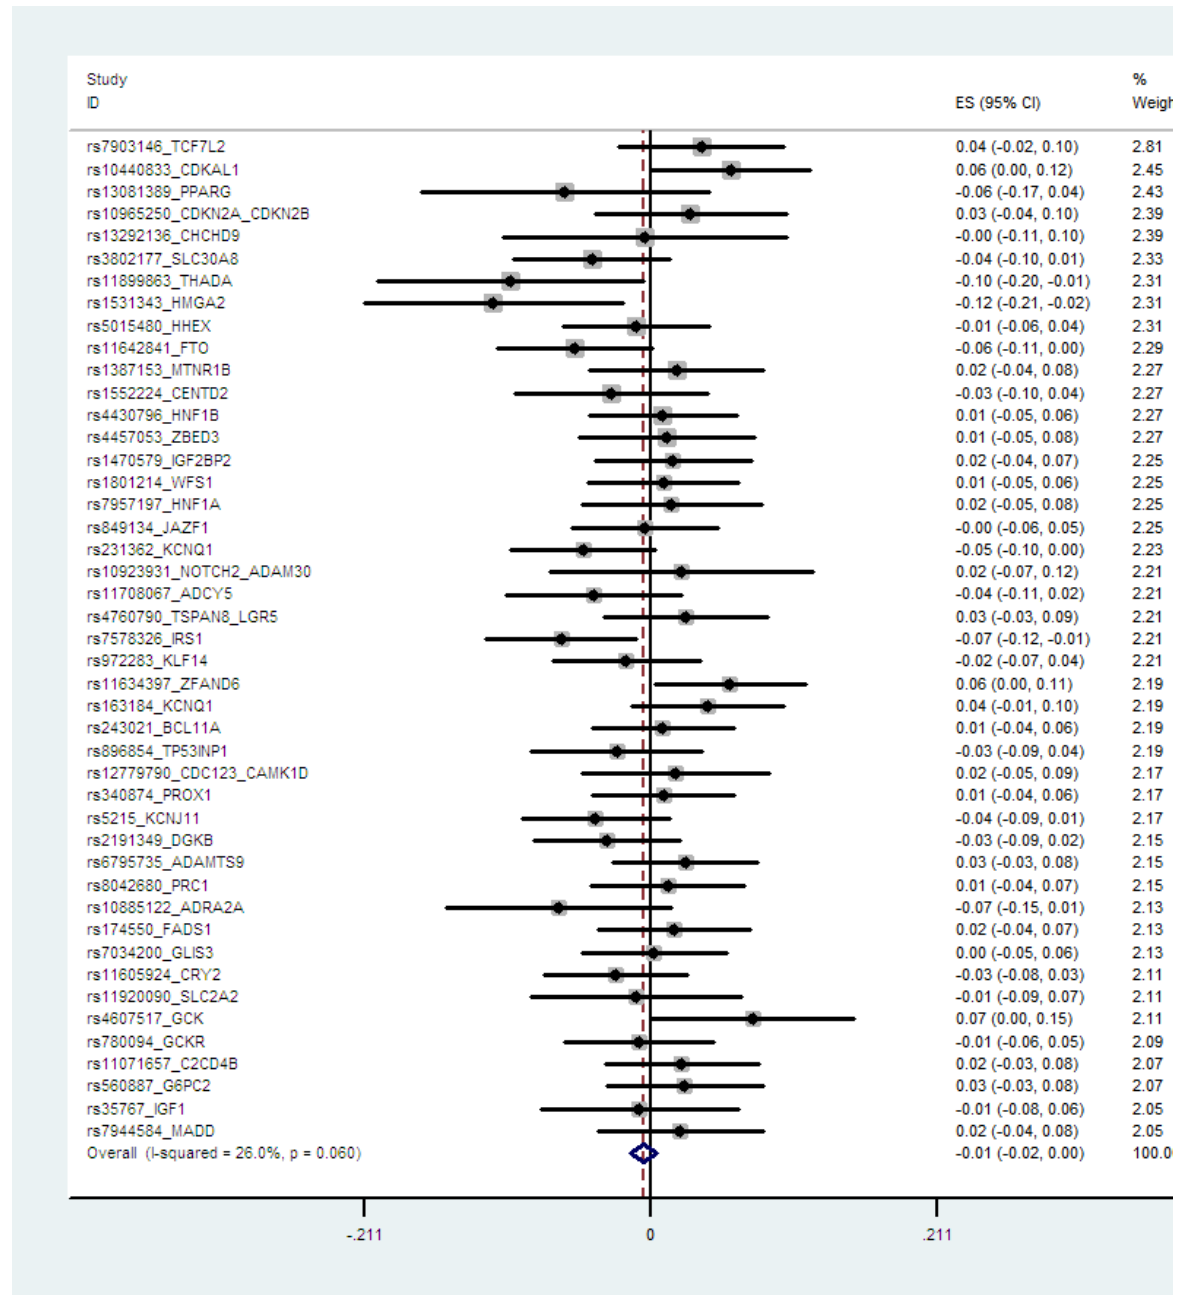

## Author Contributions

Joshua. W. Knowles contributed to the original conception, design, and worked to organize collaboration, GWAS implementation, supervised the basic science experiments and did primary work on writing the manuscript.

Weijia Xie contributed to discussion, performed data analyses and helped to write the manuscript.

Zhongyang Zhang contributed to data analysis and helped to write the manuscript.

Themistocles L. Assimes contributed to the original design of the GENESIS GWAS, the approach to association analysis, and manuscript writing.

Jussi Paananen contributed to data generation and analysis.

Ola Hansson provided samples and assisted with genotyping and data analysis.

James Pankow contributed samples and assisted with analysis.

Indumathi Chennamsetty contributed to basic science experiments in particular in vitro and in vivo characterization of *NAT2*.

Mark O. Goodarzi contributed samples and assisted with analyses.

Ivan Carcamo-Orive contributed to basic science experiments

Andrew Morris contributed to data analysis.

Yii-Der I. Chen contributed samples.

Ville-Petteri Mäkinen assisted with analyses.

Andrea Ganna assisted with analyses.

Anubha Mahajan assisted with analysis

Xiuqing Guo assisted with analyses.

Fahim Abbasi recruited subjects and assisted with data analysis.

Danielle Greenawalt contributed to discussion and data analysis.

Philip S. Tsao assisted with advice especially regarding in vitro work.

Pek Lum assisted with administration with early phases of the project.

Lars Lind assisted with data analysis.

Cliona Molony assisted with oversight of the project and data analysis.

Leslie J. Raffel provided commentary on the manuscript.

Cecilia Lindgren assisted with data analysis.

Eric Schadt contributed to data generation, overall project design.

Jerome I. Rotter contributed samples and assisted with analysis.

Alan Sinaiko contributed samples and assisted with analysis.

Gerald Reaven contributed samples and helped with overall study design and discussion.

Xia Yang assisted with analyses, writing the manuscript and discussion throughout the project.

Agnes Hsiung contributed samples and to study design, discussion.

Leif Groop contributed samples and contributed to the discussion.

Heather J. Cordell contributed to the original design and analysis approach.

Markku Laakso contributed to study design, discussion, manuscript preparation.

Ke Hao assisted with design, performed and supervised analyses, and helped to write the paper.

Erik Ingelsson contributed samples as well as to design, data generation, supervised data analyses and manuscript preparation.

Tim Frayling contributed to the original design and supervised the analyses.

Mike Weedon contributed to discussion and performed and supervised data analyses.

Mark Walker contributed samples as well as to study design, basic science experiments and discussion throughout the project.

Thomas Quertermous co-conceived of the GENESIS project and organized the investigators, contributed to analyses and manuscript writing.

## **Supplementary Acknowledgements**

The GENESIS consortium would not have been possible without the collaborative efforts of many collaborating cohorts/consortia. These studies, consortia and collaborating investigators contributed to the GENESIS effort in various ways including: Original collection of samples, genotyping efforts, data analysis, administration and oversight in collaborating cohorts and advice. We are also grateful to the individuals that participated in the studies.

**RISC (Relationship between Insulin Sensitivity and Cardiovascular disease risk):** Other collaborating investigators for this manuscript included: **Ele Ferrannini** (Department of Internal Medicine, Pisa School of Medicine, Pisa, Italy).

The full RISC consortium is:

**Vrije Universiteit Amsterdam, The Netherlands:** Jacqueline Dekker, G Nijpels, W Boersma, A Kok

**Henry Dunant Charitable Foundation, Athens, Greece:** Asimina Mitrakou, S Tournis, K Kyriakopoulou, P Thomakos

**Institute of Endocrinology, Belgrade, Serbia:** Nebojsa Lalic, K Lalic, A Jotic, L Lukic, M Covic

**St James Hospital, Dublin, Ireland:** John Nolan, TP Yeow, M Murphy, C DeLong, G Neary, MP Colgan, M Hatunic, P Gaffney, G Boran

**Frankfurt University, Germany:** Thomas Konrad, H Böhles, S Fuellert, F Baer, H Zuchhold

**University Hospital Geneva, Geneva, Switzerland:** Alain Golay, E. Harsch Bobbioni, V. Barthassat, V. Makoundou, TNO Lehmann, T Merminod

**University of Glasgow, Glasgow, UK:** JR Petrie, Colin Perry, F Neary, C MacDougall, K Shields, L Malcolm

**Kuopio University Hospital, Kuopio, Finland:** Markku Laakso, U Salmenniemi, A Aura, R Raisanen, U Ruotsalainen, T Sistonen, M Laitinen, H Saloranta

**The Royal London Hospital, London, UK:** Simon W Coppack, N McIntosh, P Khadobaksh

**Hopital Edouard Herriot, Lyon, France:** M Laville, F. Bonnet, A Brac de la Perriere, C Louche-Pelissier, C Maitrepierre, J Peyrat, A Serusclat

**Hospital Universitario de la Princesa, Madrid, Spain:** Rafael Gabriel, EM Sánchez, R. Carraro, A Frieria, B. Novella

**University of Lund, Lund, Sweden:** Peter Nilsson, M Persson, G Östling, Olle Melander, P Burri

**Ospedale San Raffaele, Milan, Italy:** Piermarco M Piatti, LD Monti, E Setola, E Galluccio, F Minicucci, A Colletuori

**Newcastle University, Newcastle-upon-Tyne, UK:** Mark Walker, IM Ibrahim, M Jayapaul, K Craig, D Carman, K Short, Y McGrady, D Richardson, L Pascoe. AJ Heggie

**Odense University Hospital, Odense, Denmark:** Henning Beck-Nielsen, P Staehr, K Hojlund, V Vestergaard, C Olsen, L Hansen

**Consiglio Nazionale delle Ricerche, Padova, Italy:** A Mari, G Pacini, C Cavaggion

**INSERM, Paris, France :** B Balkau, L Mhamdi, MT Guillauneuf

**University of Perugia, Perugia, Italy:** Geremia B Bolli, F Porcellati, C Fanelli, P Lucidi, F Calcinaro, A Saturni

**University of Pisa, Pisa, Italy:** Ele Ferrannini, Andrea Natali, E Muscelli, S Pinnola, Mcihaela Kozakova, BD Astiarraga, SA Hills, L Landucci, L Mota, Amalia Gastaldelli, D Ciociaro

**Catholico University, Rome, Italy:** Geltrude Mingrone, C Guidone, A Favuzzi. P Di Rocco

**University Hospital, Vienna, Austria:** Christian Anderwald, M Bischof, M Promintzer, M Krebs, M Mandl, A Hofer, Anton Luger, W Waldhäusl, M Roden

The consortium provided access to DNA samples, assisted with data analyses, coordination of results and manuscript approval. Mark Walker was authorized to act on behalf of the group for this manuscript.

**Stanford:** Other collaborating investigators included: **Atul Butte** (Division of Systems Medicine, Department of Pediatrics, Stanford University School of Medicine), **Keiichi Kodama** (Division of Systems Medicine, Department of Pediatrics, Stanford University School of Medicine).

This group provided advice and expertise on data analysis and insulin resistance and assistance with genotyping. Joshua W. Knowles, Thomas Quertermous were authorized to act on behalf of the group for this manuscript.

**EUGENE2 (European network on Functional Genomics of type 2 diabetes):** Other collaborating investigators for this manuscript included: **Ulf Smith** (Lundberg Laboratory for Diabetes Research, Center of Excellence for Metabolic and Cardiovascular Research, Department of Molecular and Clinical Medicine, the Sahlgrenska Academy, University of Gothenburg, Gotheburg 413 45, Sweden), **Hans-Ulrich Häring** (Department of Internal Medicine, Division of Endocrinology, Diabetology, Vascular Medicine, Nephrology and Clinical Chemistry, Member of the Deutsches Zentrum für Diabetesforschung (DZD), University of Tübingen, Otfried-Müller-Str. 10, D-72076, Tübingen, Germany), **Torben Hansen** (Section of Metabolic Genetics, Marie Krogh Center for Metabolic Research, Universitetsparken 1, University of Copenhagen, 2100 Copenhagen O, Denmark), **Oluf Pedersen** (Section of Metabolic Genetics, Marie Krogh Center for Metabolic Research, Universitetsparken 1, University of Copenhagen, 2100 Copenhagen O, Denmark).

Other members of EUGENE2 not directly involved in this manuscript are:  
Giorgio Sesti, Università degli Studi Magna Graecia di Catanzaro, Italy  
Stephen O’Rahilly, University of Cambridge-DCBio, United Kingdom  
Juleen R. Zierath, Karolinska Institute, Sweden  
Hans-Georg Joost, German Institute for Human Nutrition Potsdam-Rehbrücke (DIfE), Germany  
Francesco Beguinot, University of Naples (UNAP), Italy  
Emmanuel Van Obberghen, INSERM, France  
Johan Auwerx, École Polytechnique Fédérale de Lausanne, Switzerland  
Fatima Bosch, Universitat Autònoma de Barcelona, Spain  
Peter Lind, Biovitrum, Sweden

The consortium provided access to DNA samples, assisted with data analyses, coordination of results and manuscript approval. Markku Laakso was authorized to act on behalf of the group for this manuscript.

**ULSAM (Uppsala Longitudinal Study of Adult Men):** Genotyping was performed by the SNP&SEQ Technology Platform in Uppsala ([www.genotyping.se](http://www.genotyping.se)). We thank Tomas Axelsson, Ann-Christine Wiman and Caisa Pöntinen for their excellent assistance with genotyping. The SNP Technology Platform is supported by Uppsala University, Uppsala University Hospital and the Swedish Research Council for Infrastructures.

The ULSAM study access to DNA samples, assisted with data analyses, coordination of results and manuscript approval. Erik Ingelsson was authorized to act on behalf of the group for this manuscript.

**SAPPHIRE (Stanford Asian and Pacific Program for Hypertension and IR):** Other collaborating investigators on this manuscript included: **Low-Tone Ho** (Department of Medical Research and Education, Taipei Veterans General Hospital, Taipei, Taiwan. Section of Endocrinology and Metabolism, Department of Medicine, Taipei Veterans General Hospital, Taipei, Taiwan, Faculty of Medicine, School of Medicine, National Yang-Ming University, Taipei, Taiwan), **Lee-Ming Chuang** (Department of Internal Medicine, National Taiwan University Hospital, Taipei, Taiwan Graduate Institute of Clinical Medicine, National Taiwan University, Taipei, Taiwan), **Kuang-Chung Shih** (Division of Endocrinology & Metabolism, Taipei-Veteran General Hospital, Taipei, Taiwan), **Wen-Chang Wang** (Division of Biostatistics and Bioinformatics, Institute of Population Health Sciences, National Health Research Institutes, Zhunan, Taiwan), **Wayne Huey-Herng Sheu** (Division of Endocrinology and Metabolism, Department of Internal Medicine, Taichung Veterans Hospital, Taichung, Taiwan), **Ming-Wei Lin** (Institute of Public Health, National Yang-Ming University, Taipei, Taiwan), **Yi-Jen Hung** (Division of Endocrinology and Metabolism, Tri-Service General Hospital, National Defense Medical Center, Taiwan), **Lee-Ming Chuang** (Department of Internal Medicine, National Taiwan University Hospital, Taipei, Taiwan), **Yen-Feng Chiu** (Division of Biostatistics and Bioinformatics, Institute of Population Health Sciences, National Health Research Institutes, Zhunan, Taiwan), **Chin-Fu Hsiao** (Division of Biostatistics and Bioinformatics, Institute of Population Health Sciences, National Health Research Institutes, Zhunan, Taiwan), **I-Shou Chang** (Division of Biostatistics and Bioinformatics, Institute of Population Health Sciences, National Health Research Institutes, Zhunan, Taiwan).

The work was supported in part by grants from the National Health Research Institutes, Taiwan (PH-099-PP-03, PH-100-PP-03, PH-101-PP-03)

The consortium provided access to DNA samples, assisted with data analyses, coordination of results and manuscript approval. Chao A. Hsiung was authorized to act on behalf of the group for this manuscript.

**GUARDIAN (Genetics Underlying DIAbetes in HispaNics):** Other collaborating investigators for this manuscript included: **Anny H. Xiang** (Department of Research and Evaluation, Kaiser Permanente Southern California Medical Group, Pasadena, CA), **Kent D. Taylor** (Los Angeles Biomedical Research Institute, Harbor-UCLA Medical Center, Torrance, California), **Thomas A. Buchanan** (Department of Medicine, University of Southern California Keck School of Medicine, Los Angeles, CA), **Lynne E. Wagenknecht** (Division of Public Health Sciences, Wake Forest School of Medicine, Winston-Salem, NC), **Willa A. Hsueh** (Division of Endocrinology, Diabetes, and Metabolism, Department of Internal Medicine, The Ohio State University, Columbus, OH),

Other GUARDIAN investigators not directly involved in this manuscript are: Nicholette D. Palmer (Department of Biochemistry and Center for Genomics and Personalized Medicine Research, Wake Forest School of Medicine, Winston-Salem, NC), Carl D. Langefeld (Center for Public Health Genomics and Department of Biostatistical Sciences, Wake Forest School of Medicine, Winston-Salem, NC), Nan Wang (Department of Preventive Medicine, Keck School of Medicine of USC, Los Angeles, CA), Jill M. Norris (Department of Epidemiology, Colorado

School of Public Health, University of Colorado Denver, Aurora, CO), Tasha E. Fingerlin (Department of Epidemiology, Colorado School of Public Health, University of Colorado Denver, Aurora, CO), Carlos Lorenzo (Division of Clinical Epidemiology, University of Texas Health Sciences Center, San Antonio, TX), Marian J. Rewers (Barbara Davis Center for Diabetes, University of Colorado School of Medicine, Aurora, CO), Steven M. Haffner (Department of Medicine, Baylor College of Medicine, Houston, TX), Donald W. Bowden (Department of Biochemistry and Center for Genomics and Personalized Medicine Research, Wake Forest School of Medicine, Winston-Salem, NC), Stephen S. Rich (Center for Public Health Genomics, Department of Public Health Sciences, University of Virginia, Charlottesville, VA), Richard N. Bergman (Cedars-Sinai Diabetes and Obesity Research Institute, Los Angeles, CA), Richard M. Watanabe (Departments of Physiology and Biophysics and Preventive Medicine, Keck School of Medicine of USC, Los Angeles, CA), Talin Haritunians (Medical Genetics Research Institute, Cedars-Sinai Medical Center, Los Angeles, CA), Julie T. Ziegler (Center for Public Health Genomics and Department of Biostatistical Sciences, Wake Forest School of Medicine, Winston-Salem, NC), Adrienne H. Williams (Center for Public Health Genomics and Department of Biostatistical Sciences, Wake Forest School of Medicine, Winston-Salem, NC), Darko Stefansovski (Cedars-Sinai Diabetes and Obesity Research Institute, Los Angeles, CA), Jinrui Cui (Division of Endocrinology, Diabetes and Metabolism, Department of Medicine, Cedars-Sinai Medical Center, Los Angeles, CA), Adrienne W. Mackay (Department of Preventive Medicine, Keck School of Medicine of USC, Los Angeles, CA), Leora F. Henkin (Division of Public Health Sciences, Wake Forest School of Medicine, Winston-Salem, NC), Anthony J. G. Hanley (Departments of Nutritional Sciences and Medicine and Dalla Lana School of Public Health, University of Toronto, Ontario, Canada), Fouad Kandeel (Department of Diabetes, Endocrinology and Metabolism, City of Hope, Duarte, CA), Jerry L. Nadler (Department of Medicine, Eastern Virginia Medical School, Norfolk, Virginia).

GUARDIAN was also supported by the National Institutes of Health: IRAS (HL047887, HL047889, HL047890, HL47902); IRAS Family (HL060944, HL061019, HL060919); BetaGene (DK061628); MACAD (HL088457); HTN-IR (HL067974); NIDDM-Athero (HL055798); the Harbor/LA Biomed-Cedars-Sinai GCRC (M01-RR00425), the USC GCRC (M01-RR00043); the UCLA CTSI (UL1TR000124); the USC CTSI (UL1TR000130); the Southern California Diabetes Research Center (DK063491); and DK079888. TRIPOD was supported by a research grant from Parke Davis Pharmaceutical Research (PD-991-053).

The consortium provided access to DNA samples, assisted with data analyses, coordination of results and manuscript approval. Mark O. Goodarzi and Jerome I. Rotter were authorized to act on behalf of the group for this manuscript.

**Minnesota cohorts:** Other collaborating investigators for this manuscript included **Julia Steinberger** (Department of Pediatrics, University of Minnesota, Amplatz Children's Hospital 2450 Riverside Avenue, Minneapolis, MN 55454).

The consortium provided access to DNA samples, assisted with data analyses, coordination of results and manuscript approval. Alan Sinaiko and James Pankow were authorized to act on behalf of the group for this manuscript.

**Scandinavian cohorts:** Other collaborating investigators for this manuscript included **Peter Almgren** and **Jasmina Kravic** (both at Department of Clinical Sciences, Diabetes and Endocrinology, Lund University, CRC, Skåne University Hospital, Malmö, Sweden).

The consortium provided access to DNA samples, assisted with data analyses, coordination of results and manuscript approval. Leif Groop was authorized to act on behalf of the group for this manuscript.

**Merck:** Other collaborating investigators for this manuscript included: **Christine Suver** and **Daniel M. Kemp** (both while at Merck Research Labs, 33 Ave. Louis Pasteur, Boston, MA 02115, USA).

The consortium provided assisted with genotyping, data analyses, coordination of results and manuscript approval. Danielle Greenawalt and Cliona Molony were authorized to act on behalf of the group for this manuscript.

**Other collaborating investigators:** **Alan Attie** and **Mark Keller** (both at Biochemistry Department, 433 Babcock Drive, University of Wisconsin, Madison, WI 53706). These investigators provide advice on insulin resistance and data related to *Nat1* in mice.

Investigators in **bold** played a more direct role in the project

## References

1. Hills, S.A., Balkau, B., Coppack, S.W., Dekker, J.M., Mari, A., Natali, A., Walker, M., and Ferrannini, E. 2004. The EGIR-RISC STUDY (The European group for the study of insulin resistance: relationship between insulin sensitivity and cardiovascular disease risk): I. Methodology and objectives. *Diabetologia* 47:566-570.
2. Hedstrand, H. 1975. A study of middle-aged men with particular reference to risk factors for cardiovascular disease. *Ups J Med Sci Suppl* 19:1-61.
3. Hansen, L., Reneland, R., Berglund, L., Rasmussen, S.K., Hansen, T., Lithell, H., and Pedersen, O. 2000. Polymorphism in the glycogen-associated regulatory subunit of type 1 protein phosphatase (PPP1R3) gene and insulin sensitivity. *Diabetes* 49:298-301.
4. Hansen, L., Zethelius, B., Berglund, L., Reneland, R., Hansen, T., Berne, C., Lithell, H., Hemmings, B.A., and Pedersen, O. 2001. In vitro and in vivo studies of a naturally occurring variant of the human p85alpha regulatory subunit of the phosphoinositide 3-kinase: inhibition of protein kinase B and relationships with type 2 diabetes, insulin secretion, glucose disappearance constant, and insulin sensitivity. *Diabetes* 50:690-693.
5. Moller, A.M., Urhammer, S.A., Dalgaard, L.T., Reneland, R., Berglund, L., Hansen, T., Clausen, J.O., Lithell, H., and Pedersen, O. 1997. Studies of the genetic variability of the coding region of the hepatocyte nuclear factor-4alpha in Caucasians with maturity onset NIDDM. *Diabetologia* 40:980-983.
6. Dahlgren, A., Zethelius, B., Jensevik, K., Syvanen, A.C., and Berne, C. 2007. Variants of the TCF7L2 gene are associated with beta cell dysfunction and confer an increased risk of type 2 diabetes mellitus in the ULSAM cohort of Swedish elderly men. *Diabetologia* 50:1852-1857.
7. Warensjo, E., Ingelsson, E., Lundmark, P., Lannfelt, L., Syvanen, A.C., Vessby, B., and Riserus, U. 2007. Polymorphisms in the SCD1 gene: associations with body fat distribution and insulin sensitivity. *Obesity (Silver Spring)* 15:1732-1740.

8. DeFronzo, R.A., Tobin, J.D., and Andres, R. 1979. Glucose clamp technique: a method for quantifying insulin secretion and resistance. *Am J Physiol* 237:E214-223.
9. Pollare, T., Vessby, B., and Lithell, H. 1991. Lipoprotein lipase activity in skeletal muscle is related to insulin sensitivity. *Arteriosclerosis and thrombosis : a journal of vascular biology / American Heart Association* 11:1192-1203.
10. Boesgaard, T.W., Zilinskaite, J., Vanttinen, M., Laakso, M., Jansson, P.A., Hammarstedt, A., Smith, U., Stefan, N., Fritsche, A., Haring, H., et al. 2008. The common SLC30A8 Arg325Trp variant is associated with reduced first-phase insulin release in 846 non-diabetic offspring of type 2 diabetes patients--the EUGENE2 study. *Diabetologia* 51:816-820.
11. Laakso, M., Zilinskaite, J., Hansen, T., Boesgaard, T.W., Vanttinen, M., Stancakova, A., Jansson, P.A., Pellme, F., Holst, J.J., Kuulasmaa, T., et al. 2008. Insulin sensitivity, insulin release and glucagon-like peptide-1 levels in persons with impaired fasting glucose and/or impaired glucose tolerance in the EUGENE2 study. *Diabetologia* 51:502-511.
12. Abbasi, F., Chang, S.A., Chu, J.W., Ciaraldi, T.P., Lamendola, C., McLaughlin, T., Reaven, G.M., and Reaven, P.D. 2006. Improvements in insulin resistance with weight loss, in contrast to rosiglitazone, are not associated with changes in plasma adiponectin or adiponectin multimeric complexes. *Am J Physiol Regul Integr Comp Physiol* 290:R139-144.
13. Lamendola, C., Abbasi, F., Chu, J.W., Hutchinson, H., Cain, V., Leary, E., McLaughlin, T., Stein, E., and Reaven, G. 2005. Comparative effects of rosuvastatin and gemfibrozil on glucose, insulin, and lipid metabolism in insulin-resistant, nondiabetic patients with combined dyslipidemia. *Am J Cardiol* 95:189-193.
14. McLaughlin, T., Stuhlinger, M., Lamendola, C., Abbasi, F., Bialek, J., Reaven, G.M., and Tsao, P.S. 2006. Plasma asymmetric dimethylarginine concentrations are elevated in obese insulin-resistant women and fall with weight loss. *J Clin Endocrinol Metab* 91:1896-1900.
15. Pei, D., Jones, C.N., Bhargava, R., Chen, Y.D., and Reaven, G.M. 1994. Evaluation of octreotide to assess insulin-mediated glucose disposal by the insulin suppression test. *Diabetologia* 37:843-845.
16. Mimura, A., Kageyama, S., Maruyama, M., Ikeda, Y., and Isogai, Y. 1994. Insulin sensitivity test using a somatostatin analogue, octreotide (Sandostatin). *Hormone and metabolic research = Hormon- und Stoffwechselforschung = Hormones et metabolisme* 26:184-187.
17. Greenfield, M.S., Doberne, L., Kraemer, F., Tobey, T., and Reaven, G. 1981. Assessment of insulin resistance with the insulin suppression test and the euglycemic clamp. *Diabetes* 30:387-392.
18. Knowles, J.W., Assimes, T.L., Tsao, P.S., Natali, A., Mari, A., Quertermous, T., Reaven, G.M., and Abbasi, F. 2013. Measurement of insulin-mediated glucose uptake: direct comparison of the modified insulin suppression test and the euglycemic, hyperinsulinemic clamp. *Metabolism: clinical and experimental* 62:548-553.
19. Goodarzi, M.O., Langefeld, C.D., Xiang, A.H., Chen, Y.D., Guo, X., Hanley, A.J., Raffel, L.J., Kandeel, F., Nadler, J.L., Buchanan, T.A., et al. 2014. Insulin sensitivity and insulin clearance are heritable and have strong genetic correlation in Mexican Americans. *Obesity* 22:1157-1164.

20. Xiang, A.H., Azen, S.P., Raffel, L.J., Tan, S., Cheng, L.S., Diaz, J., Toscano, E., Henderson, P.C., Hodis, H.N., Hsueh, W.A., et al. 2001. Evidence for joint genetic control of insulin sensitivity and systolic blood pressure in hispanic families with a hypertensive proband. *Circulation* 103:78-83.
21. Goodarzi, M.O., Guo, X., Taylor, K.D., Quinones, M.J., Samayoa, C., Yang, H., Saad, M.F., Palotie, A., Krauss, R.M., Hsueh, W.A., et al. 2003. Determination and use of haplotypes: ethnic comparison and association of the lipoprotein lipase gene and coronary artery disease in Mexican-Americans. *Genetics in medicine : official journal of the American College of Medical Genetics* 5:322-327.
22. Wang, Y.-P., Kandeel, F., Taylor, K.D., Hernandez, D., Saad, M.F., Nadler, J.L., and Raffel, L.J. 2000. Insulin and blood pressure are linked to the LDL receptor-related protein locus on chromosome 12q *Diabetes* 49 A204.
23. Sivanandam, S., Sinaiko, A.R., Jacobs, D.R., Jr., Steffen, L., Moran, A., and Steinberger, J. 2006. Relation of increase in adiposity to increase in left ventricular mass from childhood to young adulthood. *The American journal of cardiology* 98:411-415.
24. Frohnert, B.I., Jacobs, D.R., Jr., Steinberger, J., Moran, A., Steffen, L.M., and Sinaiko, A.R. 2013. Relation between serum free fatty acids and adiposity, insulin resistance, and cardiovascular risk factors from adolescence to adulthood. *Diabetes* 62:3163-3169.
25. Steffen, L.M., Sinaiko, A.R., Zhou, X., Moran, A., Jacobs, D.R., Jr., Korenfeld, Y., Dengel, D.R., Chow, L.S., and Steinberger, J. 2013. Relation of adiposity, television and screen time in offspring to their parents. *BMC pediatrics* 13:133.
26. Holmkvist, J., Tojjar, D., Almgren, P., Lyssenko, V., Lindgren, C.M., Isomaa, B., Tuomi, T., Berglund, G., Renstrom, E., and Groop, L. 2007. Polymorphisms in the gene encoding the voltage-dependent Ca(2+) channel Ca (V)2.3 (CACNA1E) are associated with type 2 diabetes and impaired insulin secretion. *Diabetologia* 50:2467-2475.
27. Groop, L., Forsblom, C., Lehtovirta, M., Tuomi, T., Karanko, S., Nissen, M., Ehrnstrom, B.O., Forsen, B., Isomaa, B., Snickars, B., et al. 1996. Metabolic consequences of a family history of NIDDM (the Botnia study): evidence for sex-specific parental effects. *Diabetes* 45:1585-1593.
28. Eriksson, J., Franssila-Kallunki, A., Ekstrand, A., Saloranta, C., Widen, E., Schalin, C., and Groop, L. 1989. Early metabolic defects in persons at increased risk for non-insulin-dependent diabetes mellitus. *The New England journal of medicine* 321:337-343.
29. Tripathy, D., Wessman, Y., Gullstrom, M., Tuomi, T., and Groop, L. 2003. Importance of obtaining independent measures of insulin secretion and insulin sensitivity during the same test: results with the Botnia clamp. *Diabetes Care* 26:1395-1401.
30. Ranade, K., Hsuing, A.C., Wu, K.D., Chang, M.S., Chen, Y.T., Hebert, J., Chen, Y.I., Olshen, R., Curb, D., Dzau, V., et al. 2000. Lack of evidence for an association between alpha-adducin and blood pressure regulation in Asian populations. *Am J Hypertens* 13:704-709.
31. Lin, M.W., Hwu, C.M., Huang, Y.H., Sheu, W.H., Shih, K.C., Chiang, F.T., Olshen, R., Chen, Y.D., Curb, J.D., Rodriguez, B., et al. 2006. Directly measured insulin resistance and the assessment of clustered cardiovascular risks in hypertension. *Am J Hypertens* 19:1118-1124.
32. Price, A.L., Patterson, N.J., Plenge, R.M., Weinblatt, M.E., Shadick, N.A., and Reich, D. 2006. Principal components analysis corrects for stratification in genome-wide association studies. *Nat Genet* 38:904-909.

33. Li, Y., Willer, C.J., Ding, J., Scheet, P., and Abecasis, G.R. 2010. MaCH: using sequence and genotype data to estimate haplotypes and unobserved genotypes. *Genetic epidemiology* 34:816-834.
34. Howie, B., Fuchsberger, C., Stephens, M., Marchini, J., and Abecasis, G.R. 2012. Fast and accurate genotype imputation in genome-wide association studies through pre-phasing. *Nature Genetics* 44:955-959.
35. Li, Y., Willer, C., Sanna, S., and Abecasis, G. 2009. Genotype imputation. *Annual review of genomics and human genetics* 10:387-406.
36. Marchini, J., Howie, B., Myers, S., McVean, G., and Donnelly, P. 2007. A new multipoint method for genome-wide association studies by imputation of genotypes. *Nature Genetics* 39:906-913.
37. Purcell, S., Neale, B., Todd-Brown, K., Thomas, L., Ferreira, M.A., Bender, D., Maller, J., Sklar, P., de Bakker, P.I., Daly, M.J., et al. 2007. PLINK: a tool set for whole-genome association and population-based linkage analyses. *American journal of human genetics* 81:559-575.
38. Zhou, X., and Stephens, M. 2012. Genome-wide efficient mixed-model analysis for association studies. *Nature Genetics* 44:821-824.
39. Yue, P., Jin, H., Xu, S., Aillaud, M., Deng, A.C., Azuma, J., Kundu, R.K., Reaven, G.M., Quertermous, T., and Tsao, P.S. 2011. Apelin decreases lipolysis via G(q), G(i), and AMPK-Dependent Mechanisms. *Endocrinology* 152:59-68.
40. Blodgett, A.B., Kothinti, R.K., Kamysenko, I., Petering, D.H., Kumar, S., and Tabatabai, N.M. 2011. A fluorescence method for measurement of glucose transport in kidney cells. *Diabetes technology & therapeutics* 13:743-751.
41. Valenzuela, D.M., Murphy, A.J., Frendewey, D., Gale, N.W., Economides, A.N., Auerbach, W., Poueymirou, W.T., Adams, N.C., Rojas, J., Yasenchak, J., et al. 2003. High-throughput engineering of the mouse genome coupled with high-resolution expression analysis. *Nature biotechnology* 21:652-659.
42. Yue, P., Jin, H., Aillaud, M., Deng, A.C., Azuma, J., Asagami, T., Kundu, R.K., Reaven, G.M., Quertermous, T., and Tsao, P.S. 2010. Apelin is necessary for the maintenance of insulin sensitivity. *American journal of physiology. Endocrinology and metabolism* 298:E59-67.
43. Scott, R.A., Lagou, V., Welch, R.P., Wheeler, E., Montasser, M.E., Luan, J., Magi, R., Strawbridge, R.J., Rehnberg, E., Gustafsson, S., et al. 2012. Large-scale association analyses identify new loci influencing glycemic traits and provide insight into the underlying biological pathways. *Nature Genetics* 44:991-1005.
